# Supplementary material for: Stereoselective Synthesis of δ- and ε-Amino Ketone Derivatives from N-tert-Butanesulfinyl Aldimines and Functionalized Organolithium Compounds
Source: MDPI journal article supplement (doi:10.3390/molecules26216503), 2021-10-28
Supplement: s1 [file s1]

# Stereoselective Synthesis of $\delta$ - and $\epsilon$ -Amino Ketone Derivatives from *N*-*tert*-Butanesulfinyl Aldimines and Functionalized Organolithium Compounds

Ana Sirvent<sup>1,2,3</sup>, Francisco Foubelo<sup>1,2,3,\*</sup> and Miguel Yus<sup>3,\*</sup>

<sup>1</sup> Departamento de Química Orgánica, Facultad de Ciencias, Universidad de Alicante, Apdo. 99, 03080 Alicante, Spain; ana.sirvent@ua.es (A.S.); foubelo@ua.es (F.F.)

<sup>2</sup> Instituto de Síntesis Orgánica (ISO), Universidad de Alicante, Apdo. 99, 03080 Alicante, Spain

<sup>3</sup> Centro de Innovación en Química Avanzada (ORFEO-CINQA), Universidad de Alicante, Apdo. 99, 03080 Alicante, Spain; yus@ua.es (M.Y.)

\* Correspondence: foubelo@ua.es; yus@ua.es; Tel.: +34-965909672

## Table of Contents

|                                                                                                                                   |         |
|-----------------------------------------------------------------------------------------------------------------------------------|---------|
| <sup>1</sup> H-NMR, <sup>13</sup> C-NMR, DEPT spectra of compounds <b>2</b> , <b>7</b> , <b>9</b> , <b>11</b> and <b>13</b> ..... | S2-S21  |
| Chiral GC chromatograms of compounds <b>13a</b> and <i>ent</i> - <b>13a</b> .....                                                 | S22-S24 |

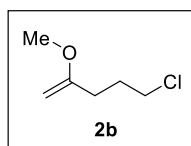

# 5-Chloro-2-methoxypent-1-ene (**2b**)

$^1\text{H-NMR}$  (400 MHz,  $\text{CDCl}_3$ )

Crude of the reaction  
(product not purified)

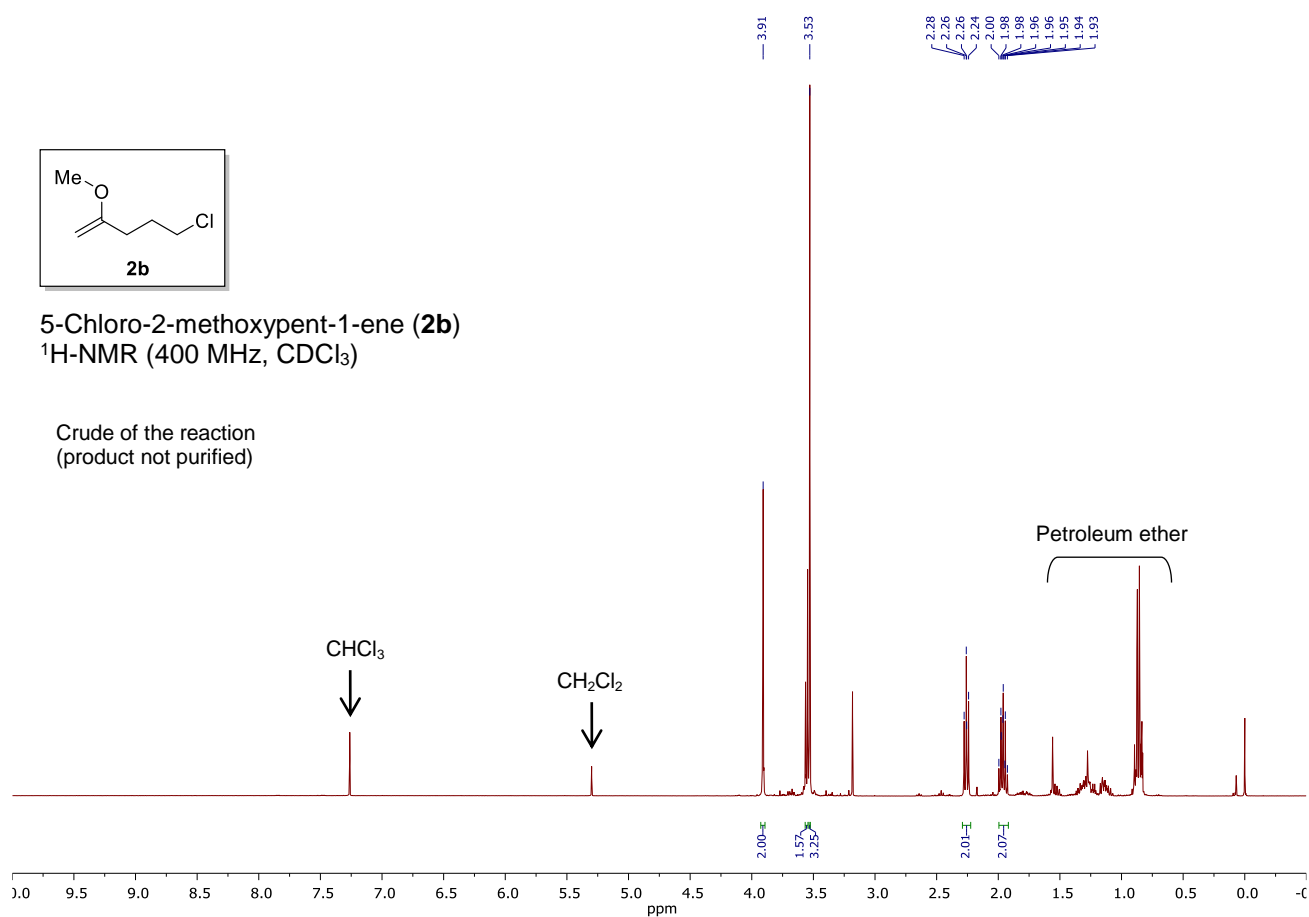

$^{13}\text{C-NMR}$  (100 MHz,  $\text{CDCl}_3$ )

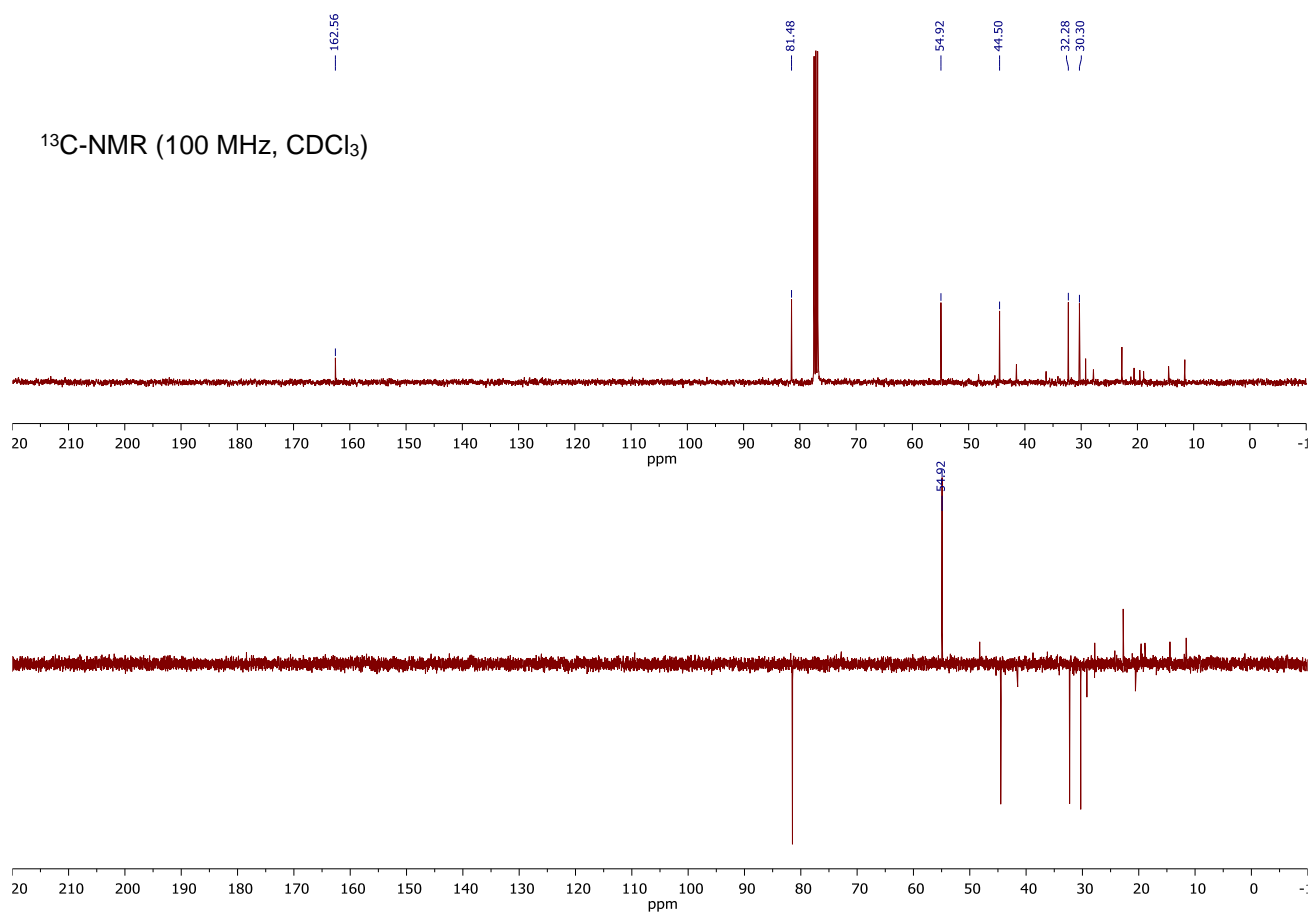

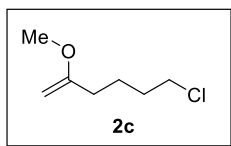

6-Chloro-2-methoxyhex-1-ene (**2c**)

$^1\text{H-NMR}$  (400 MHz,  $\text{CDCl}_3$ )

Crude of the reaction  
(product not purified)

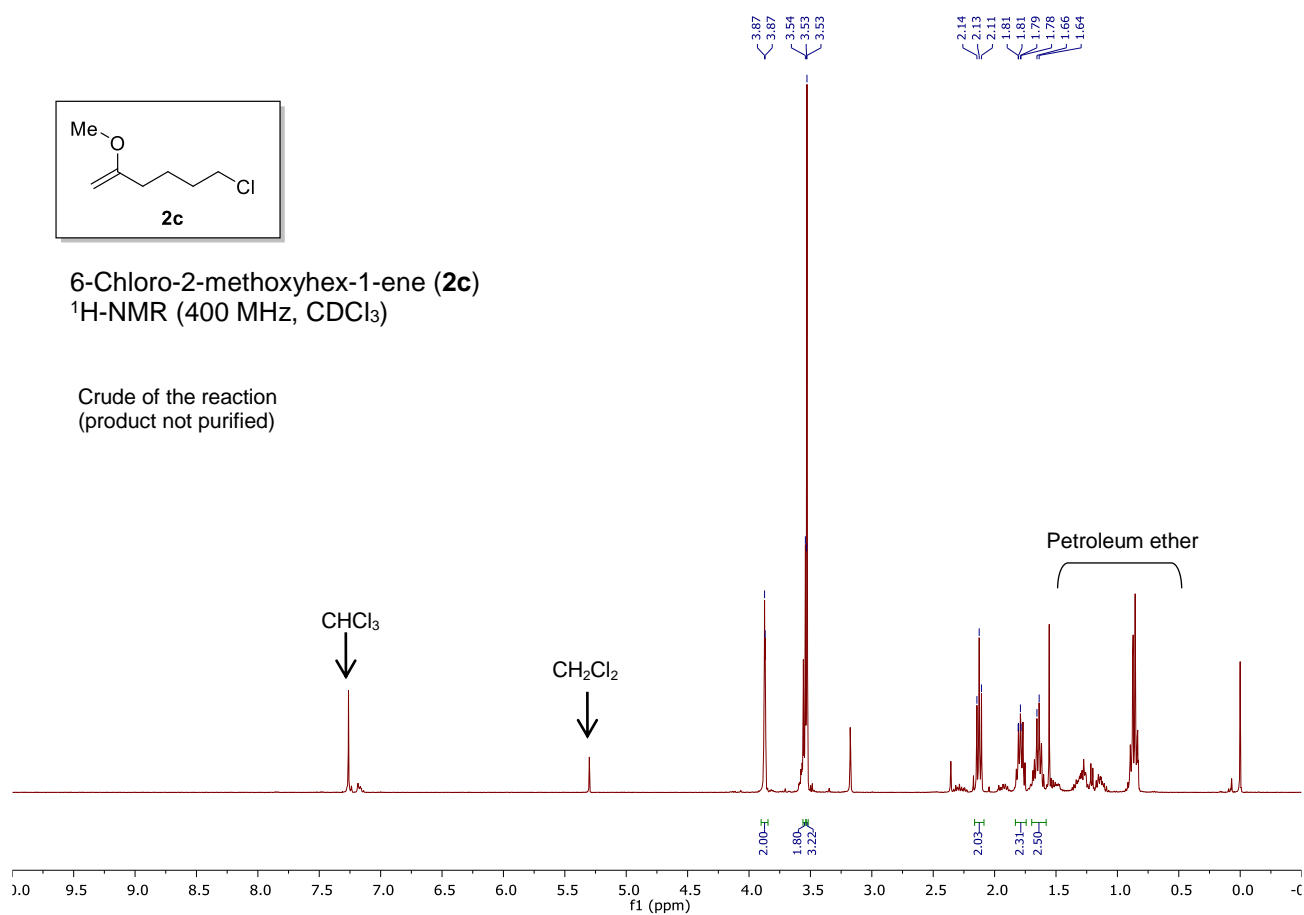

$^{13}\text{C-NMR}$  (100 MHz,  $\text{CDCl}_3$ )

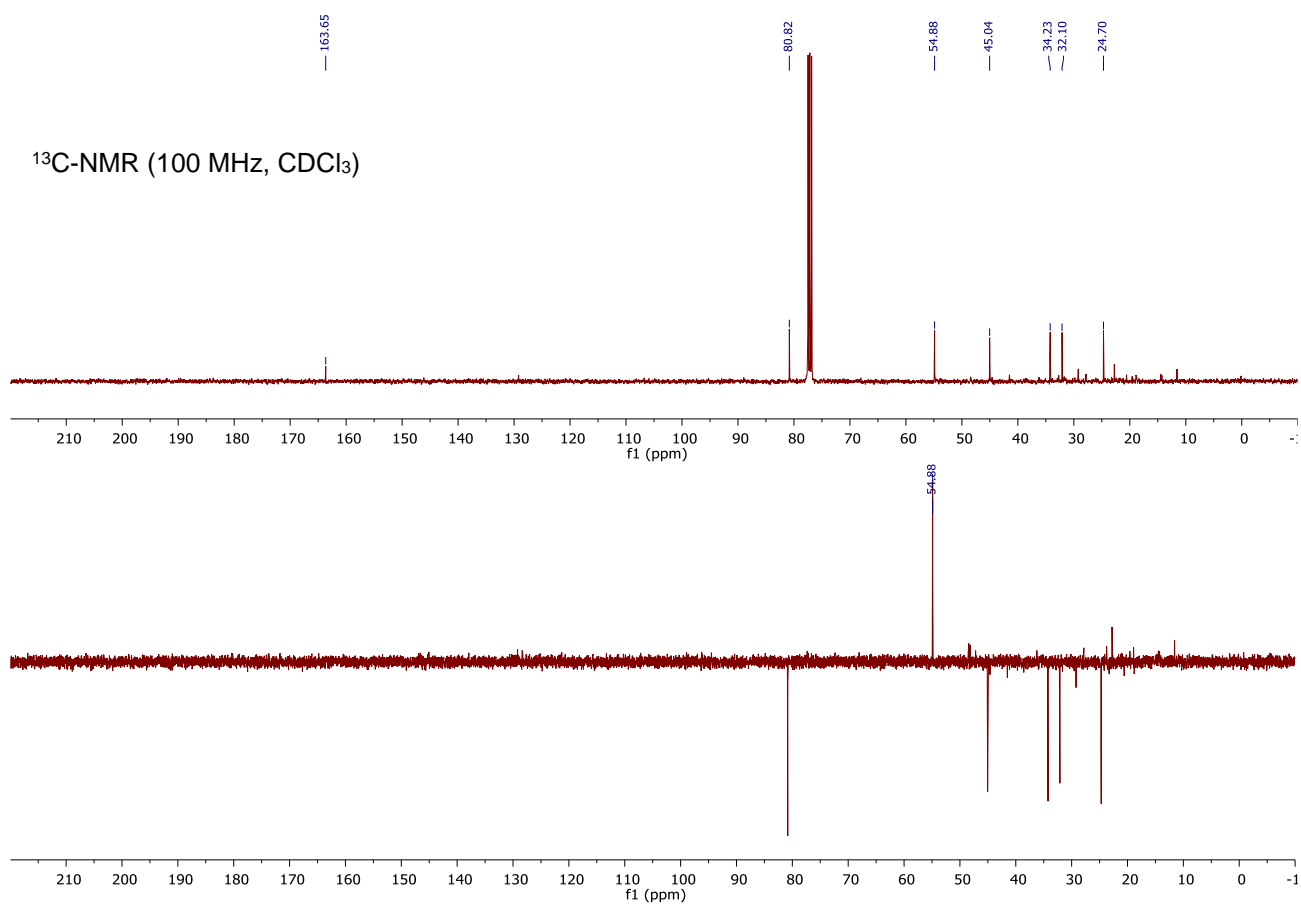

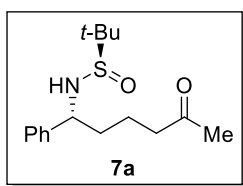

(1*R*,*R*<sub>s</sub>)-1-Amino-*N*-(*tert*-butanesulfinyl)-1-phenylhexan-5-one (**7a**)

<sup>1</sup>H-NMR (400 MHz, CDCl<sub>3</sub>)

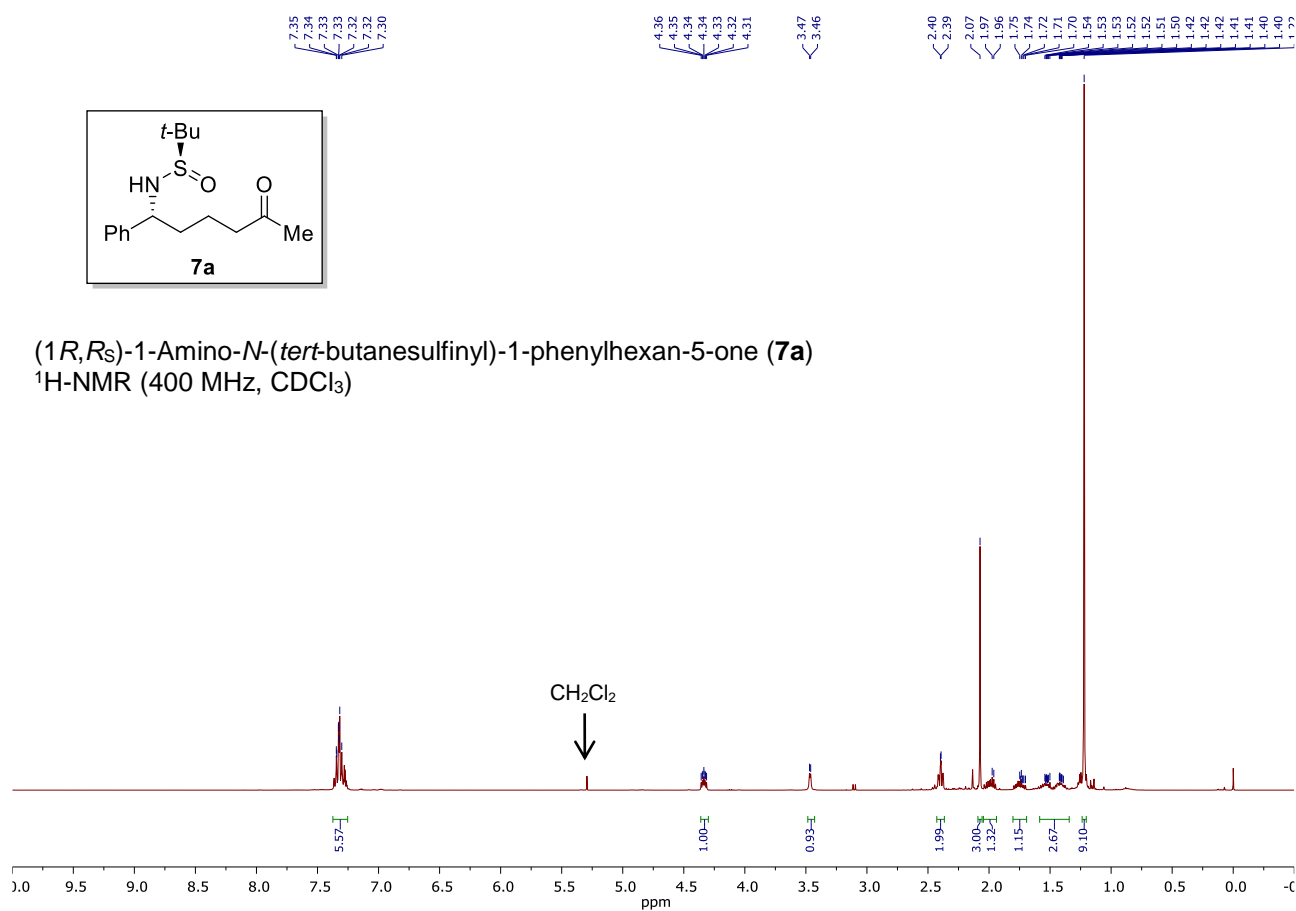

<sup>13</sup>C-NMR (100 MHz, CDCl<sub>3</sub>)

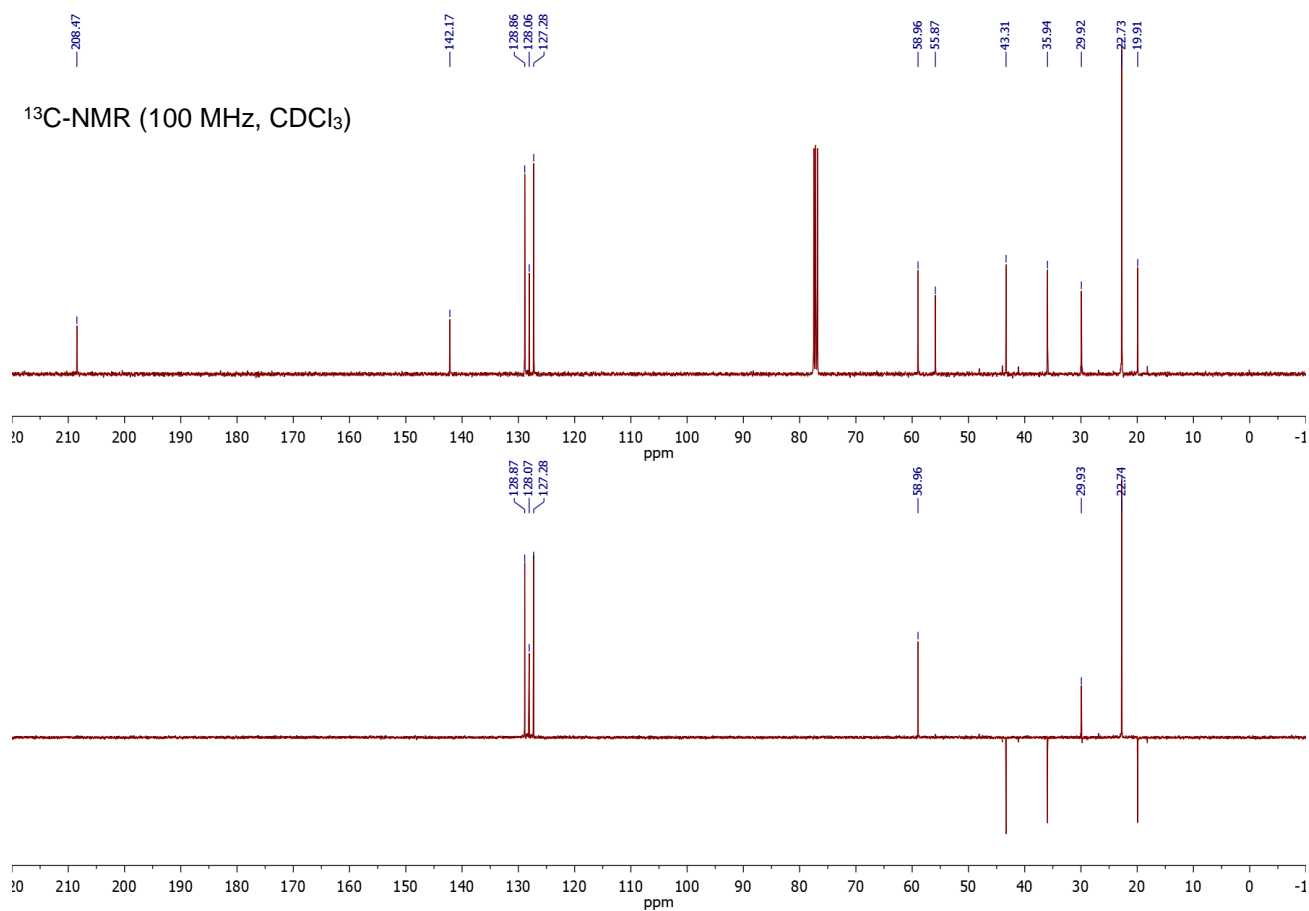

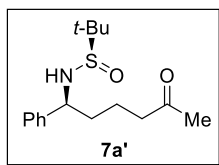

(1*S*,*R*<sub>s</sub>)-1-Amino-*N*-(*tert*-butanesulfinyl)-1-phenylhexan-5-one (**7a'**)

<sup>1</sup>H-NMR (400 MHz, CDCl<sub>3</sub>)

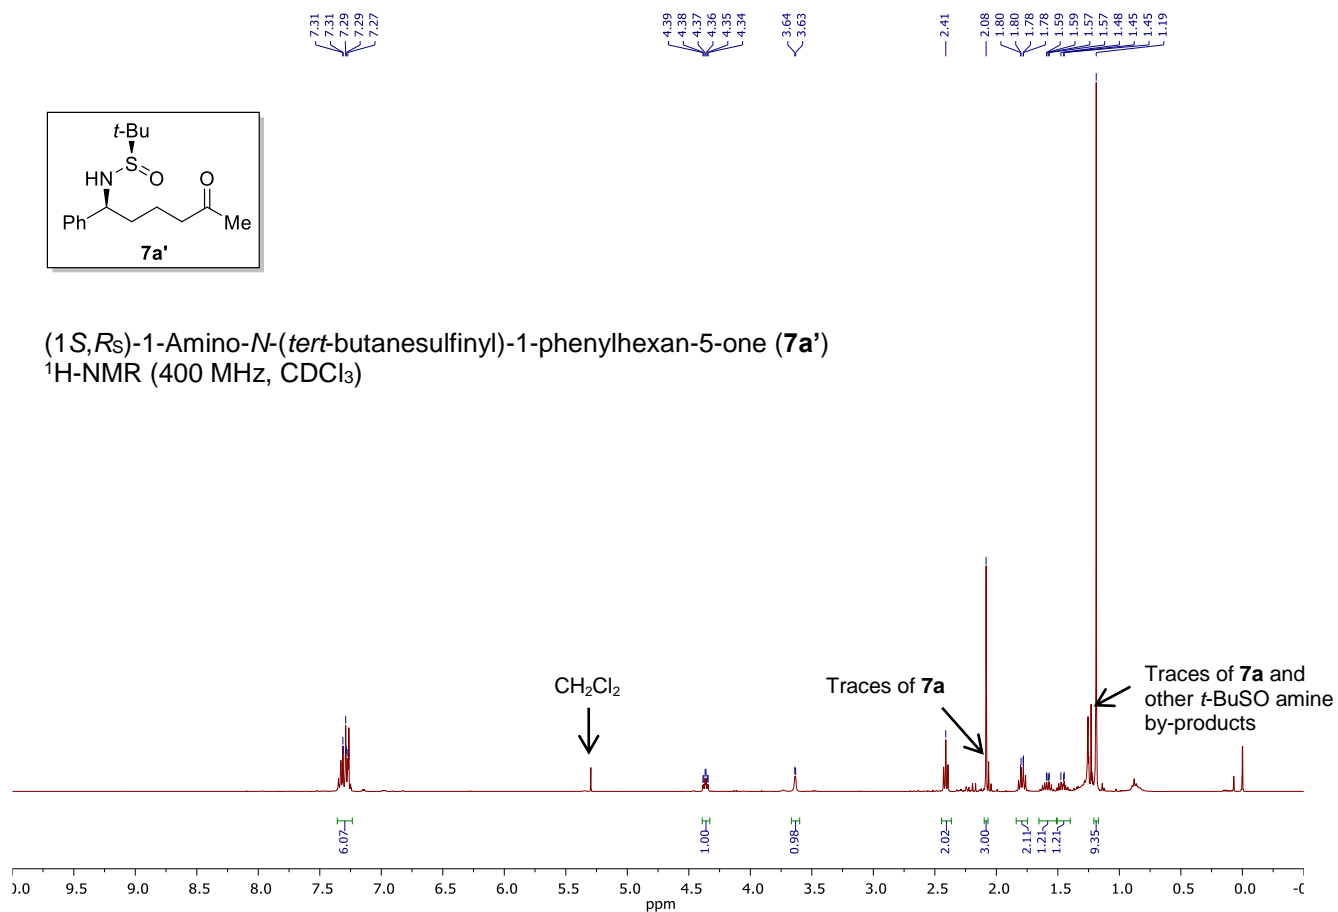

<sup>13</sup>C-NMR (100 MHz, CDCl<sub>3</sub>)

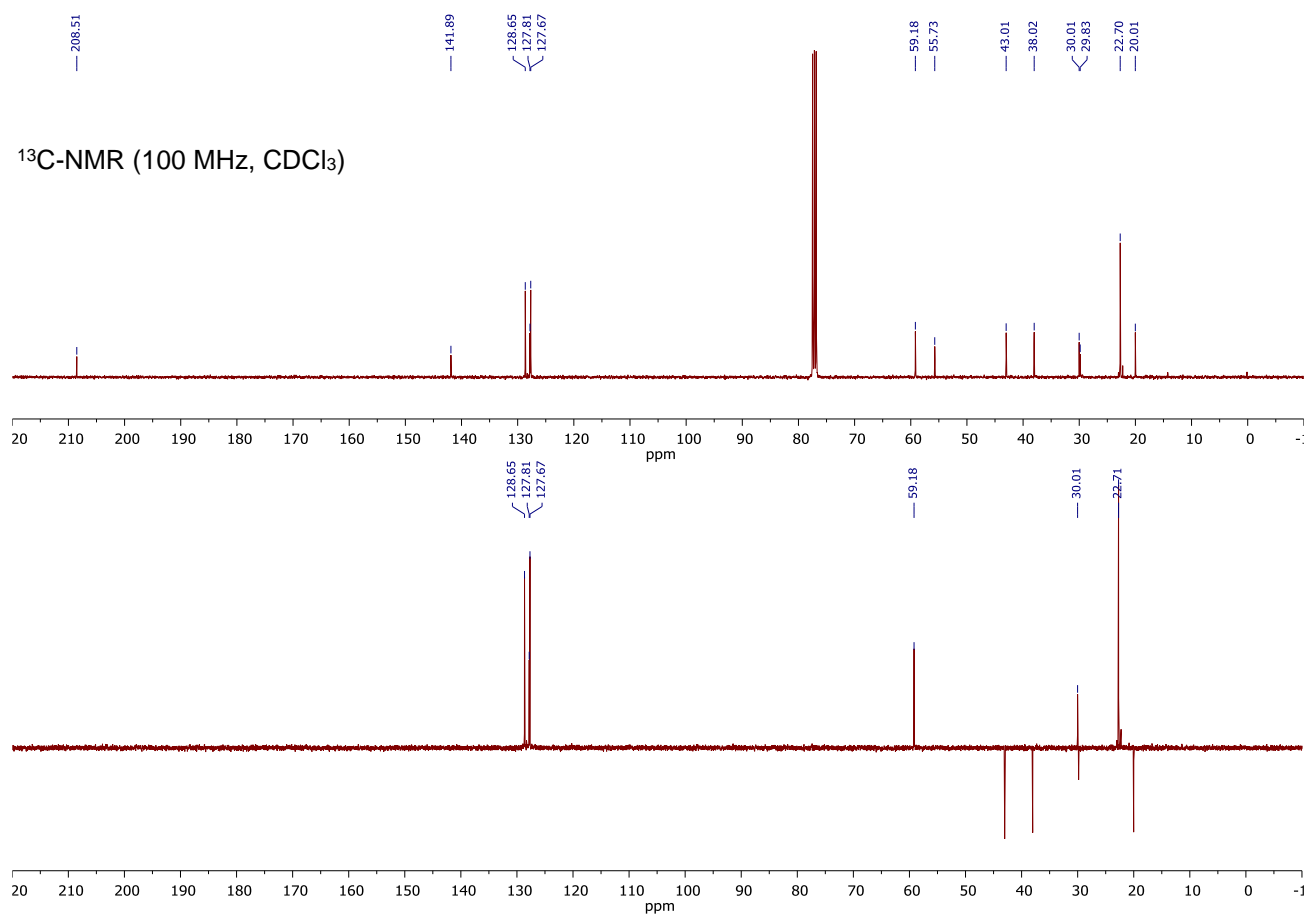

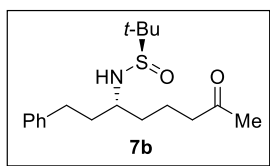

(3*R*,8*S*)-3-Amino-*N*-(*tert*-butanesulfinyl)-1-phenyloctan-7-one (**7b**)

$^1\text{H-NMR}$  (400 MHz,  $\text{CDCl}_3$ )

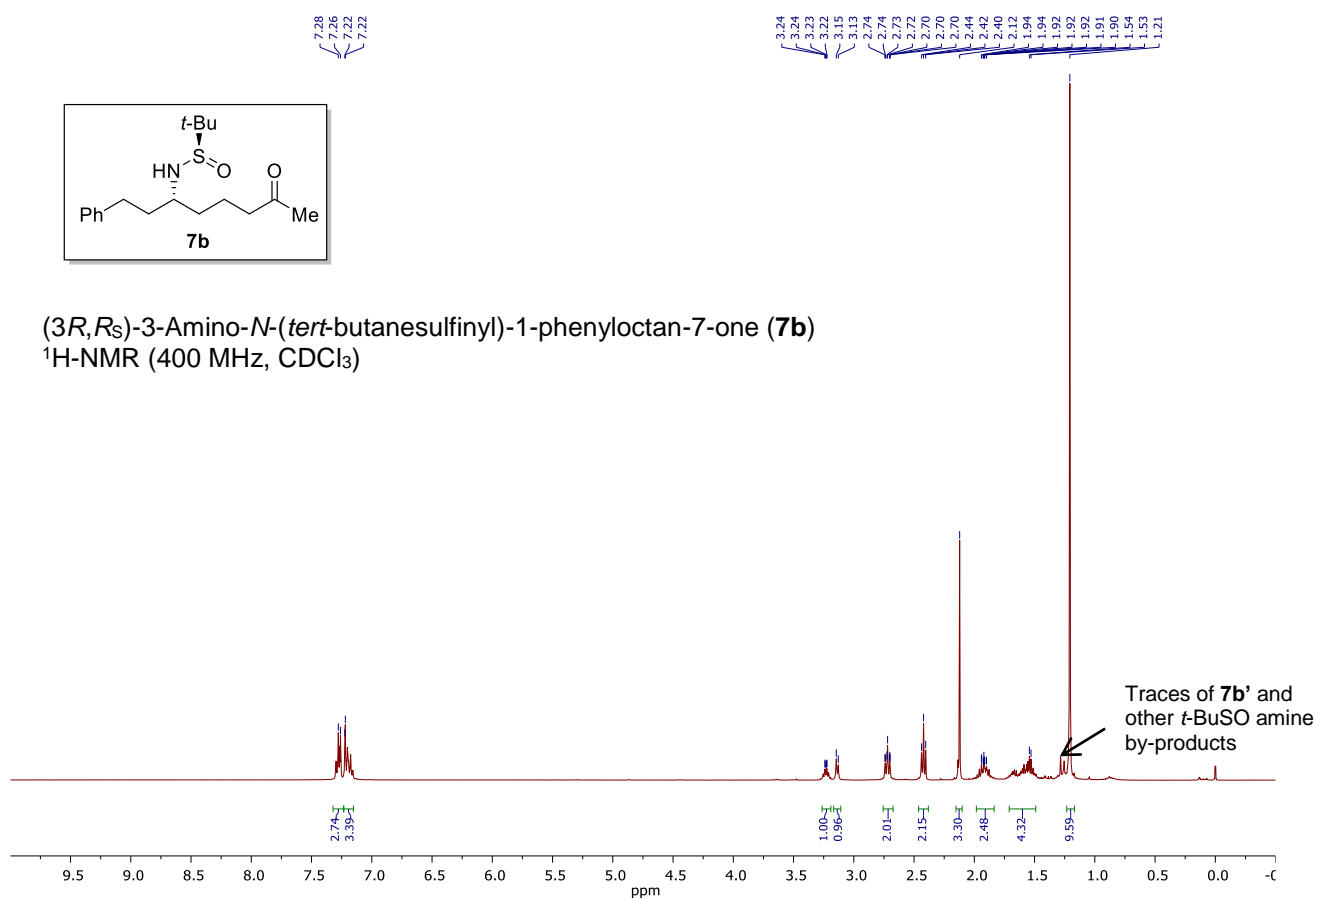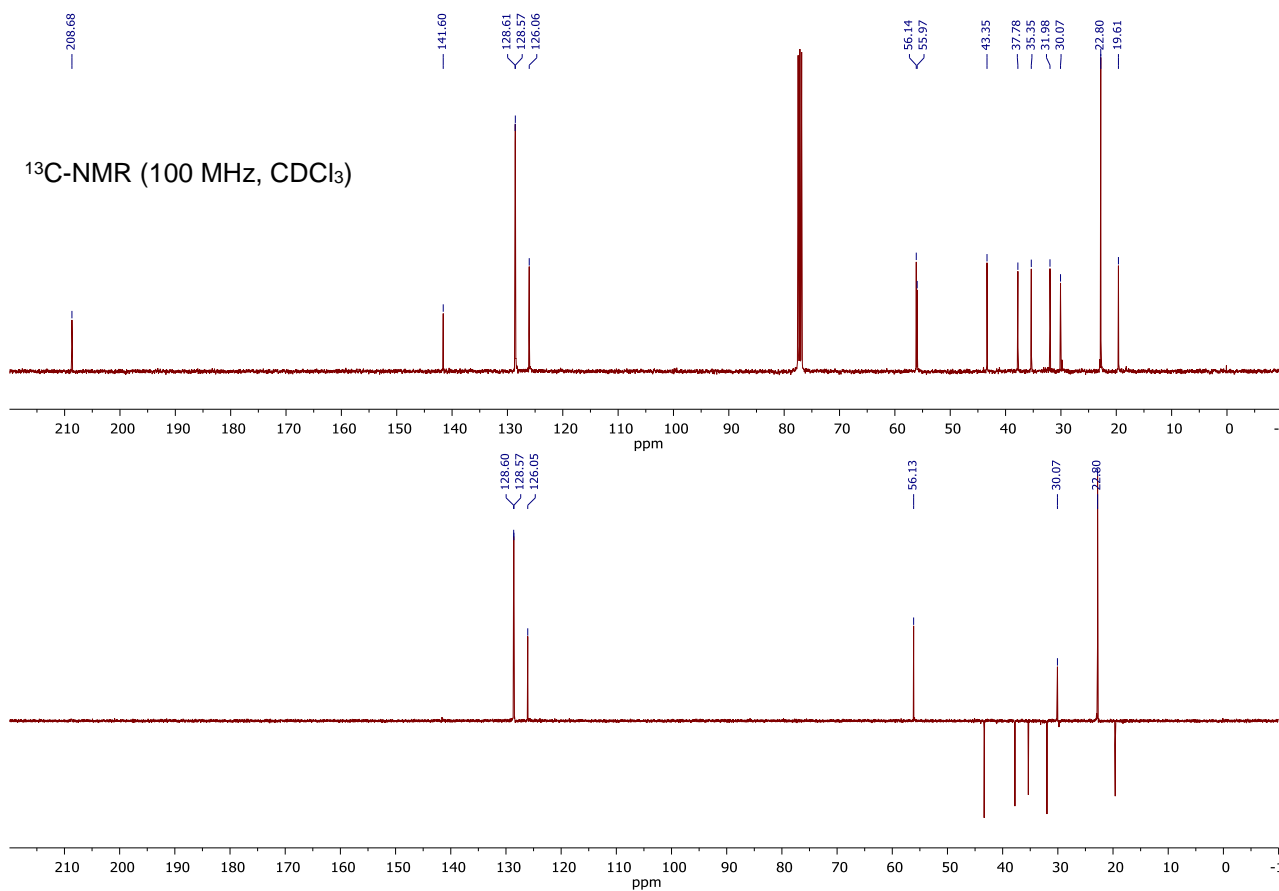

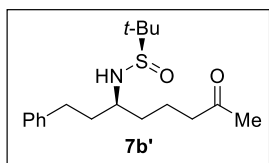

(3*S*,*R*<sub>S</sub>)-3-Amino-*N*-(*tert*-butanesulfinyl)-1-phenyloctan-7-one (**7b'**)  
<sup>1</sup>H-NMR (400 MHz, CDCl<sub>3</sub>)

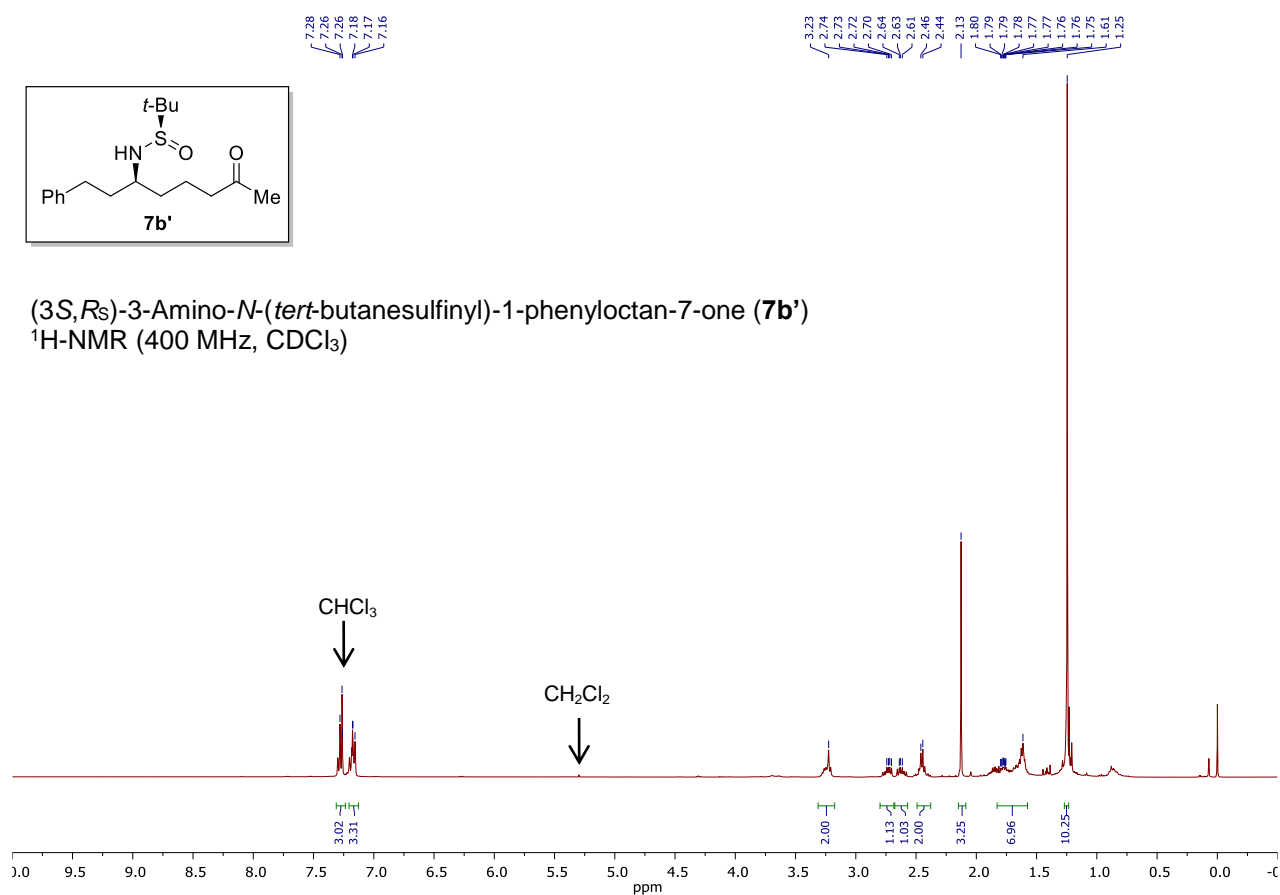

<sup>13</sup>C-NMR (100 MHz, CDCl<sub>3</sub>)

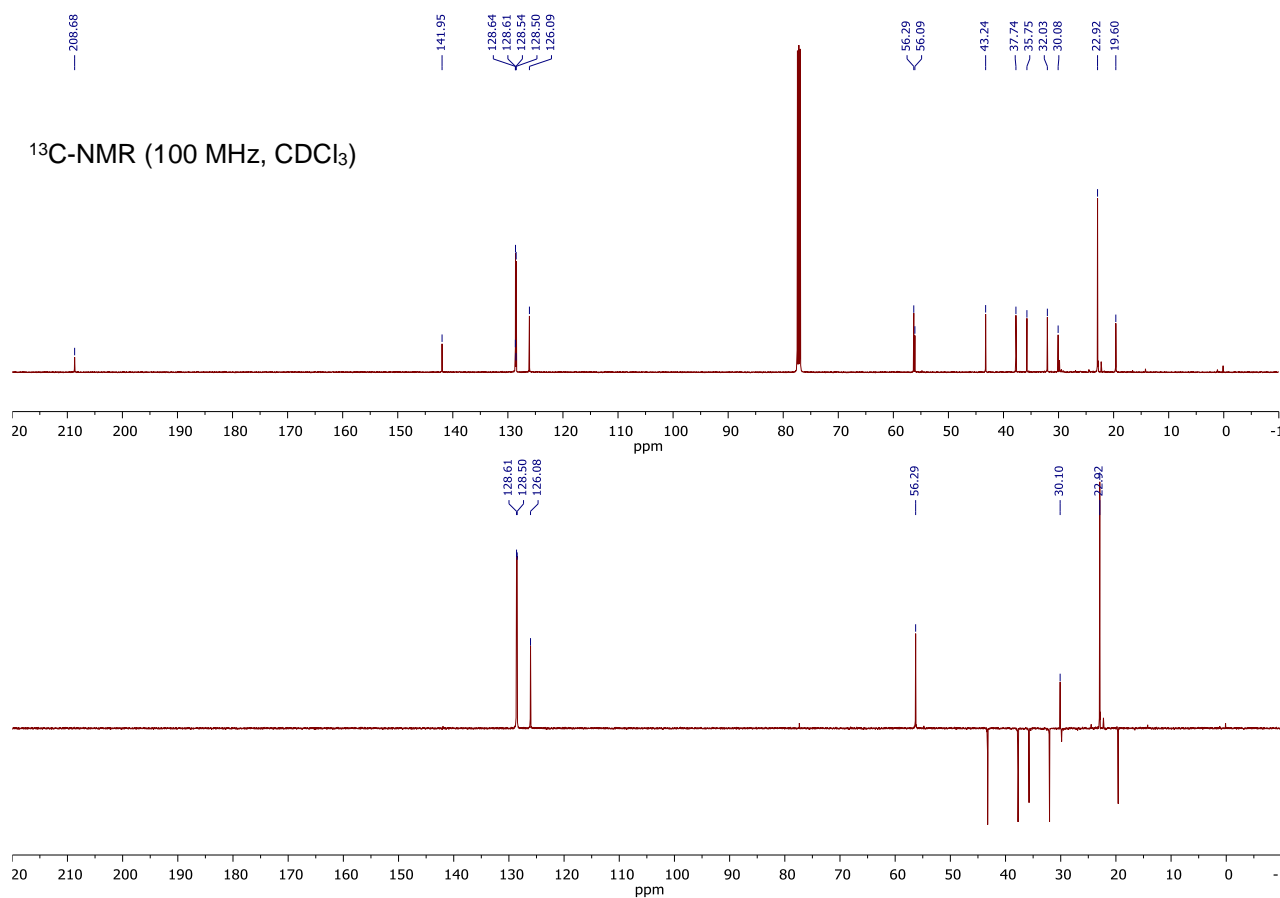

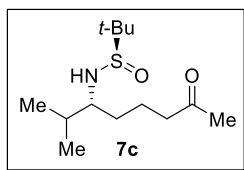

(3*R*,8*S*)-3-Amino-*N*-(*tert*-butanesulfinyl)-2-methyloctan-7-one (**7c**)

$^1\text{H}$ -NMR (400 MHz,  $\text{CDCl}_3$ )

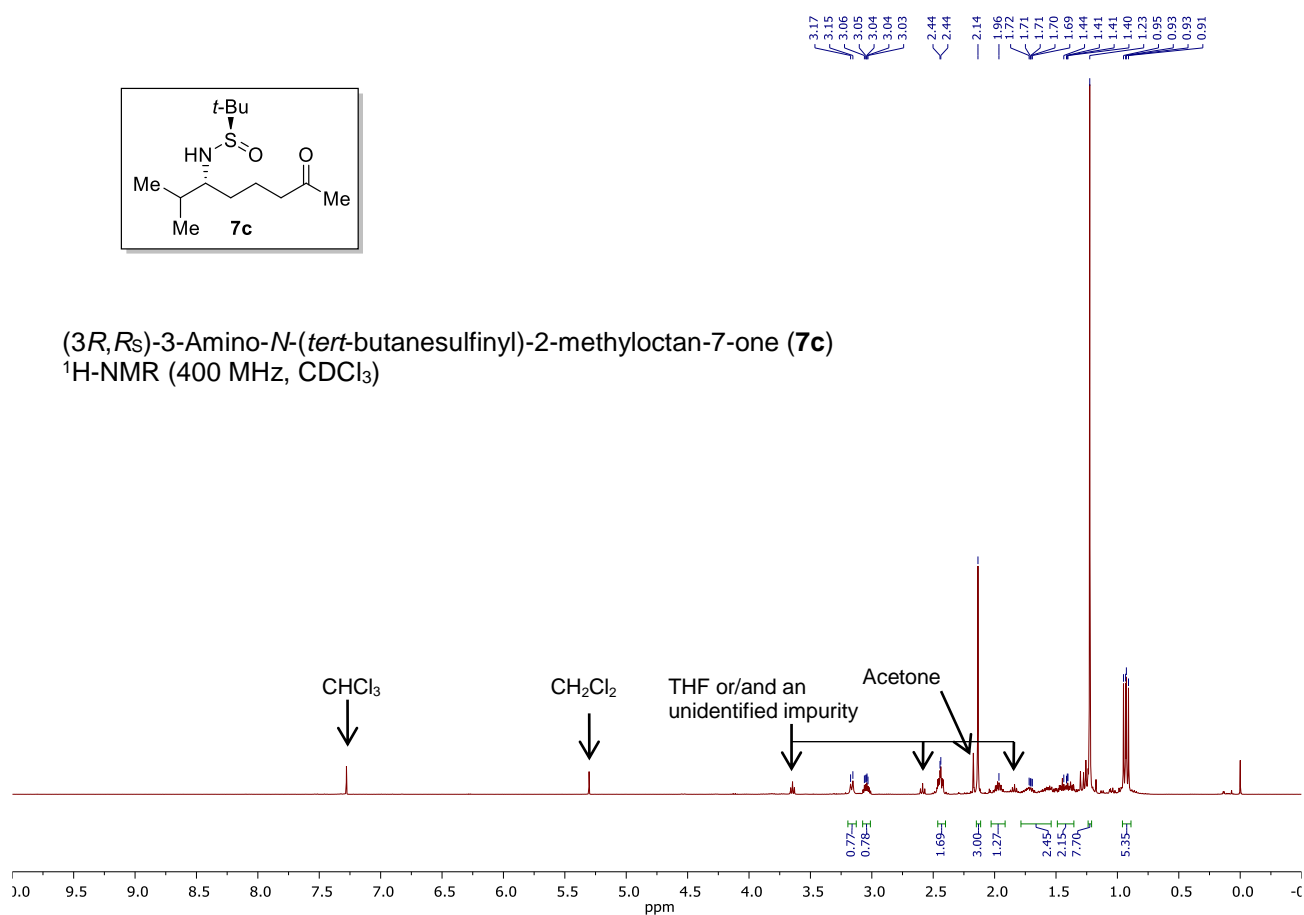

$^{13}\text{C}$ -NMR (100 MHz,  $\text{CDCl}_3$ )

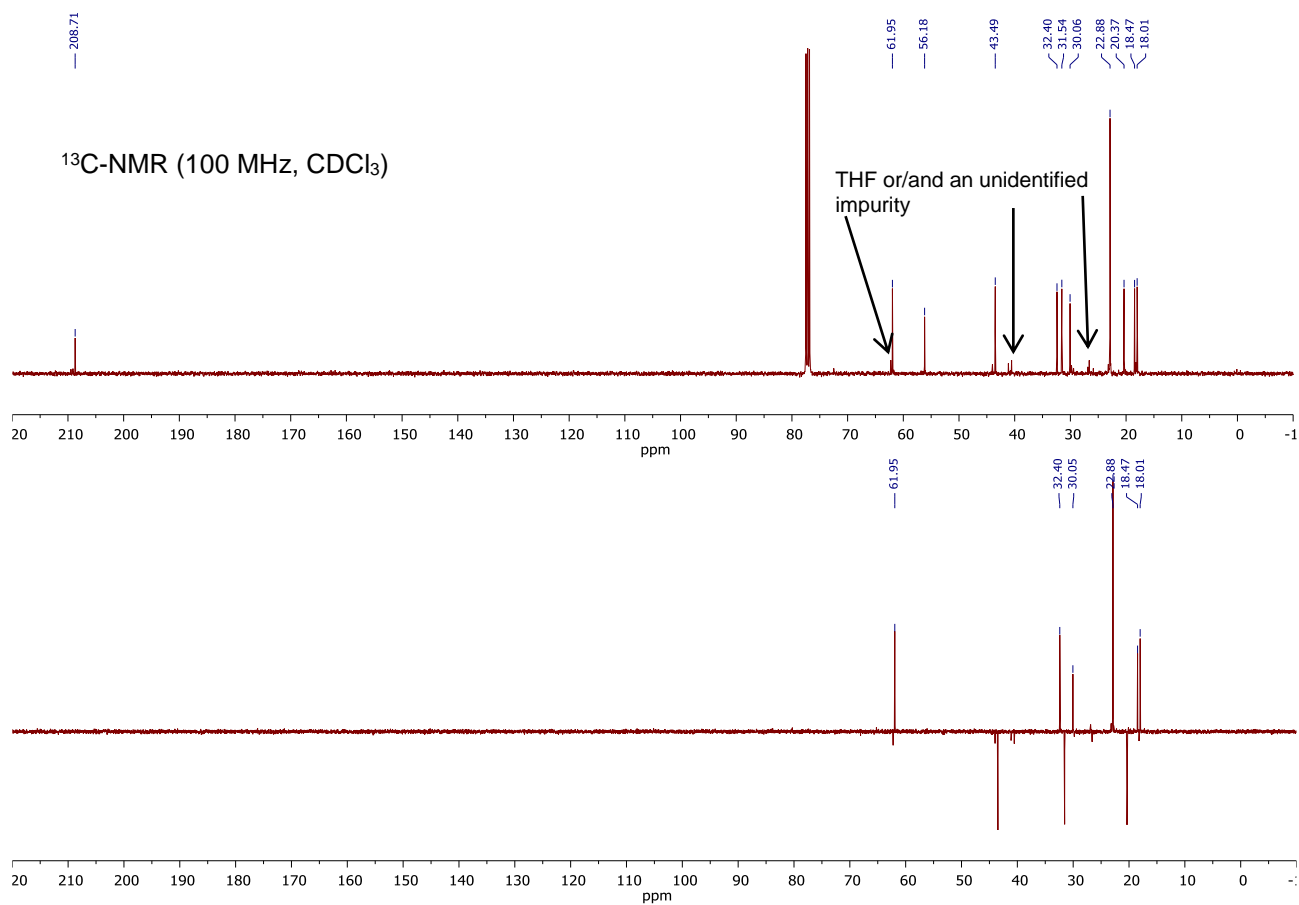



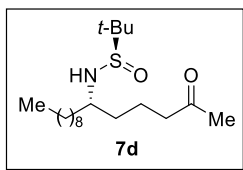

(6*S*, *R<sub>S</sub>*)-6-Amino-*N*-(*tert*-butanesulfinyl)pentadecan-2-one (**7d**)  
<sup>1</sup>H-NMR (400 MHz, CDCl<sub>3</sub>)

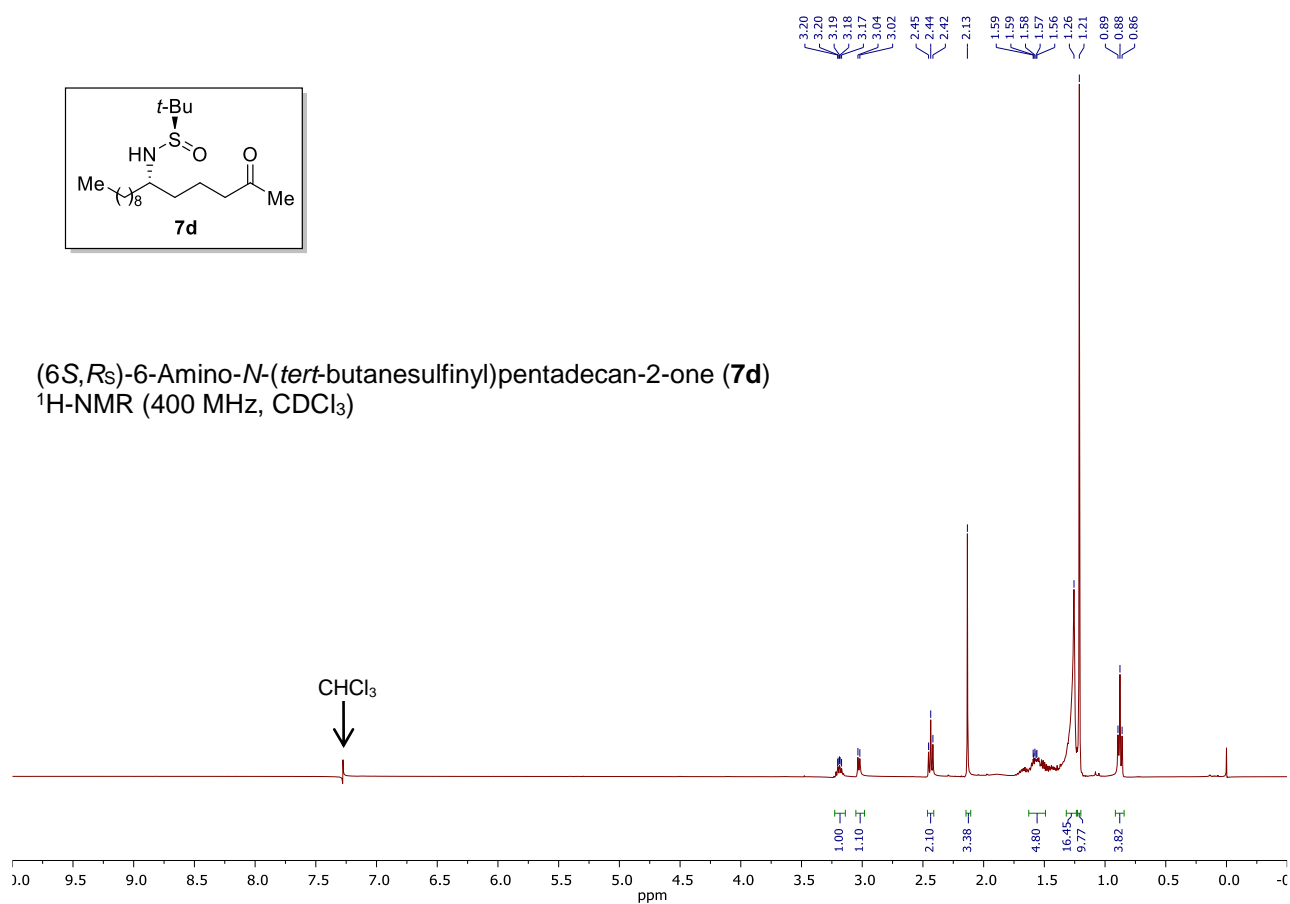

<sup>13</sup>C-NMR (100 MHz, CDCl<sub>3</sub>)

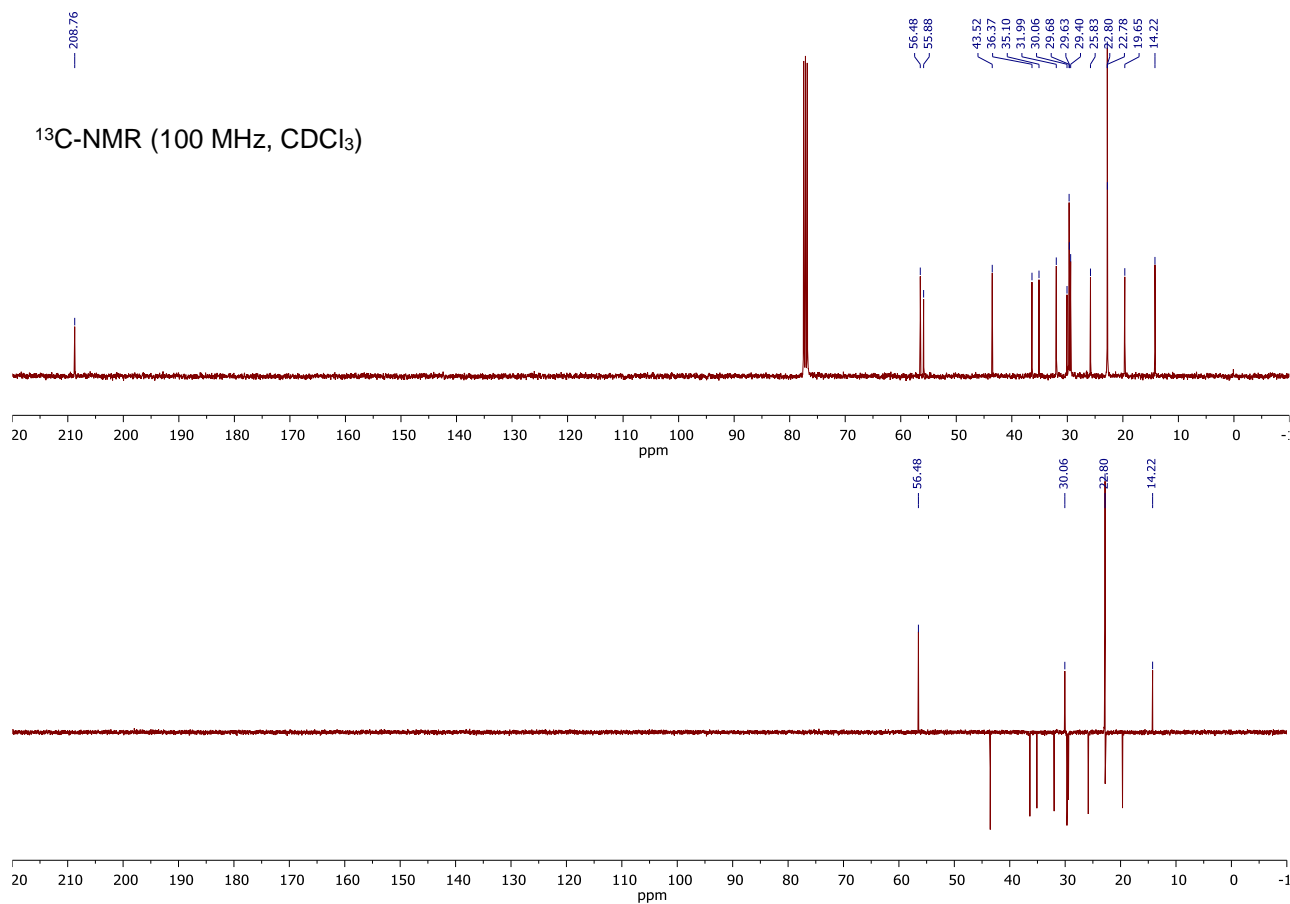

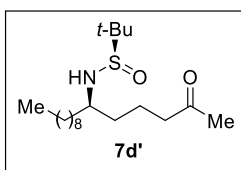

(6*R*,*R*<sub>S</sub>)-6-Amino-*N*-(*tert*-butanesulfinyl)pentadecan-2-one (**7d'**)

<sup>1</sup>H-NMR (400 MHz, CDCl<sub>3</sub>)

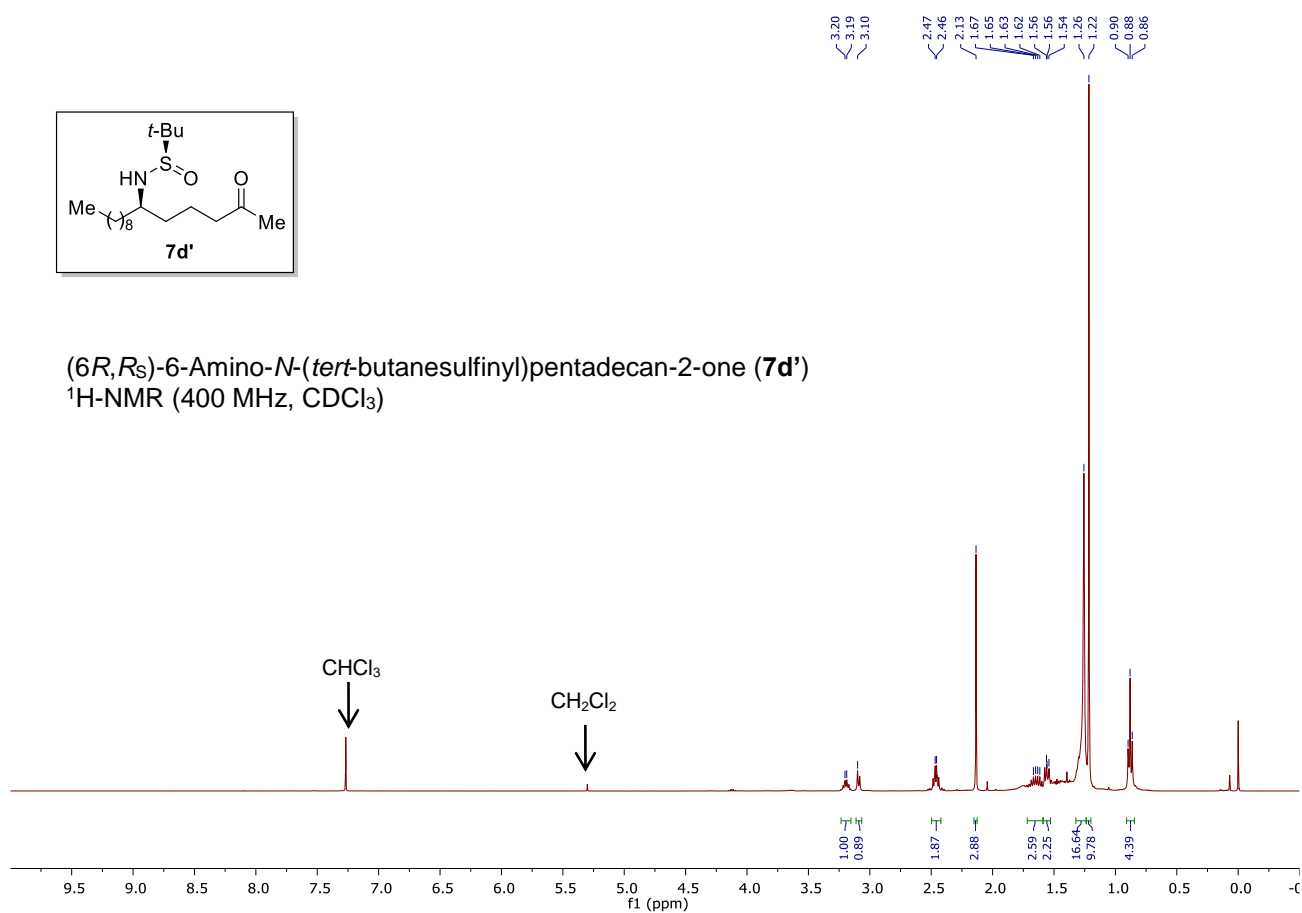

<sup>13</sup>C-NMR (100 MHz, CDCl<sub>3</sub>)

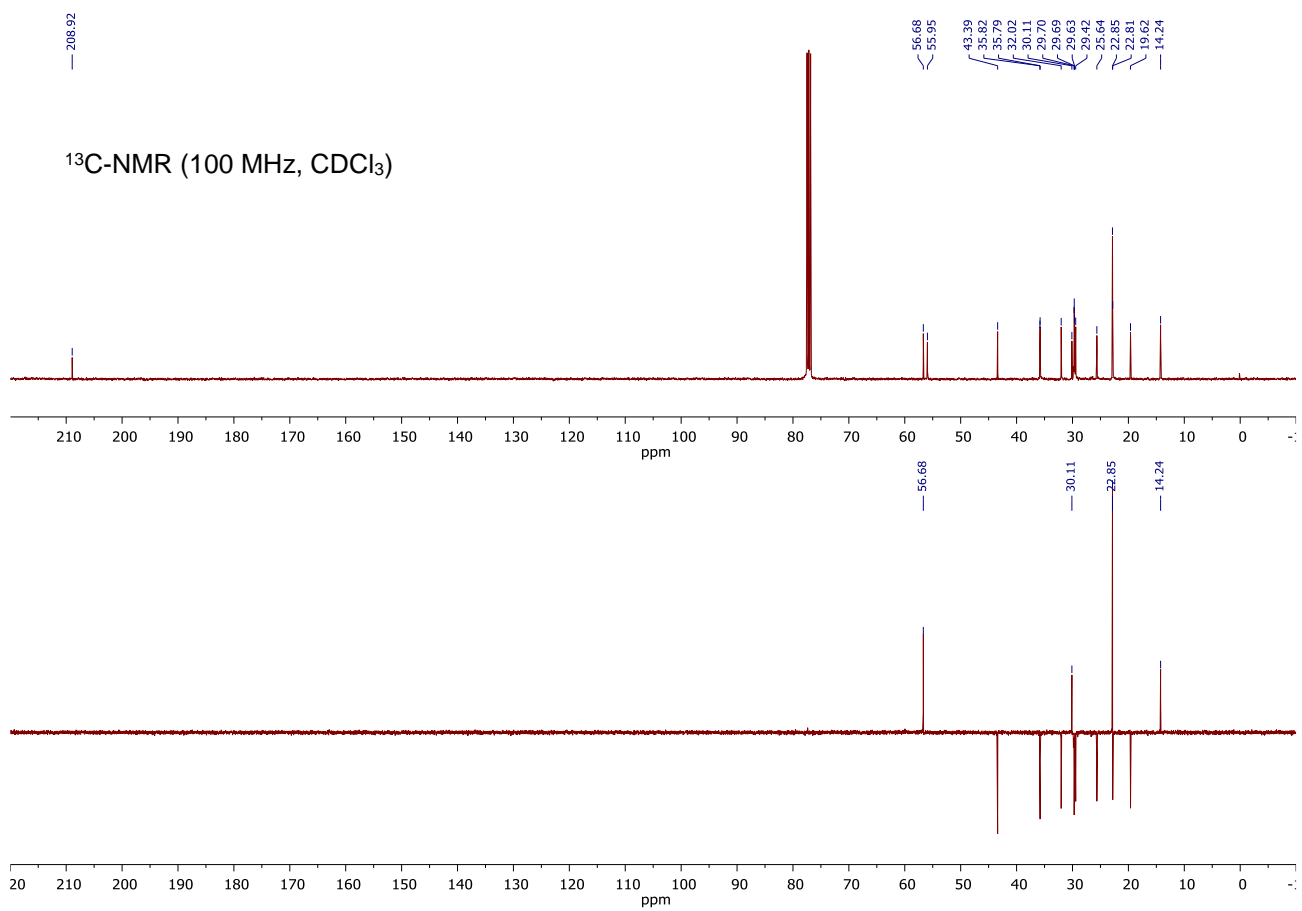

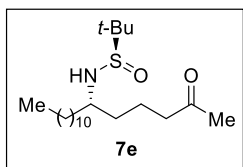

(6*S*, *R<sub>S</sub>*)-6-Amino-*N*-(*tert*-butanesulfinyl)heptadecan-2-one (**7e**)  
<sup>1</sup>H-NMR (400 MHz, CDCl<sub>3</sub>)

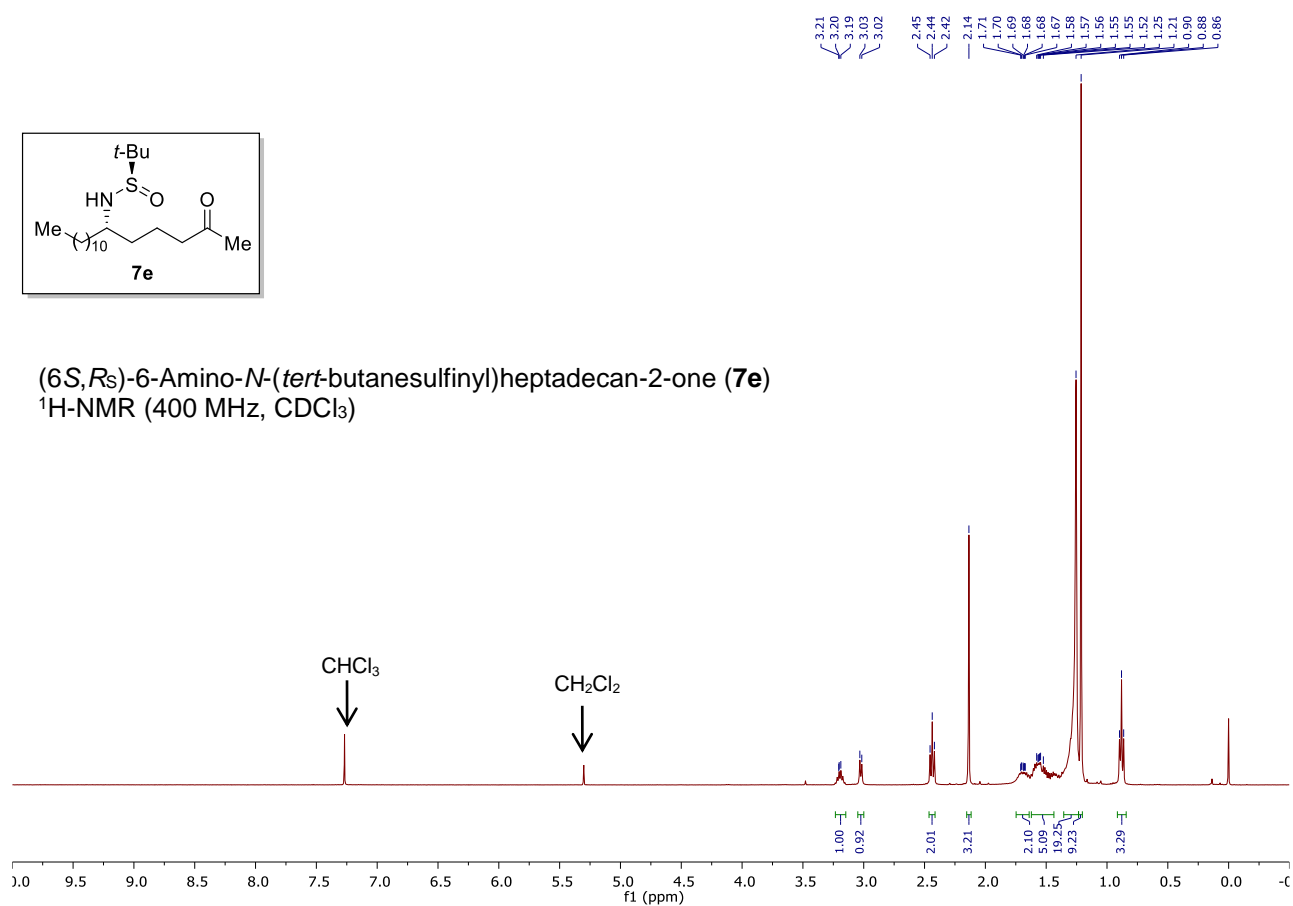

<sup>13</sup>C-NMR (100 MHz, CDCl<sub>3</sub>)

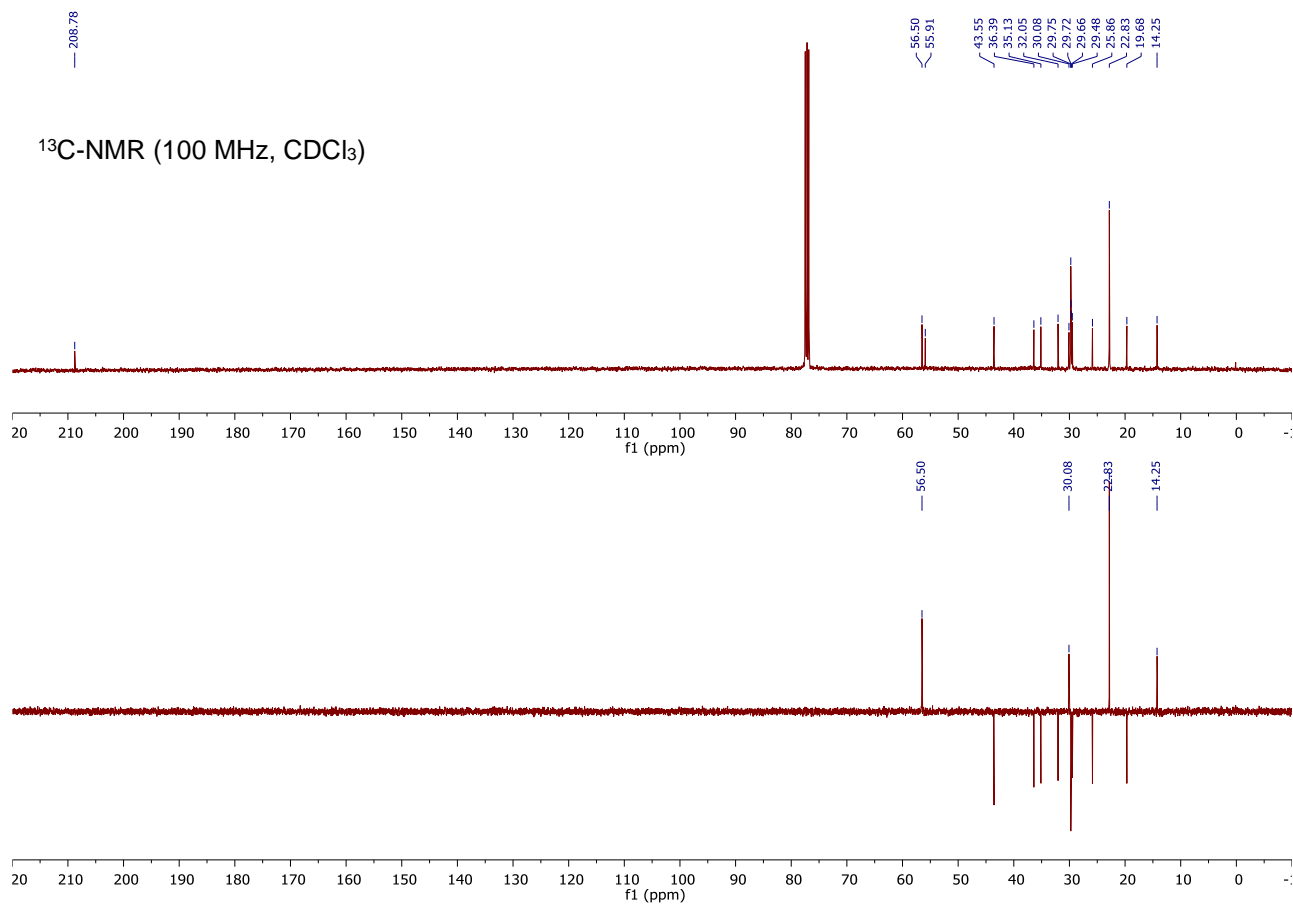

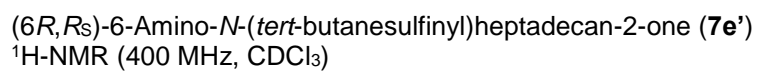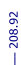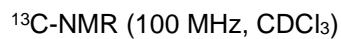

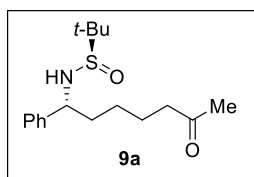

(1*R*,*R*<sub>S</sub>)-1-Amino-*N*-(*tert*-butanesulfinyl)-1-phenylheptan-6-one (**9a**)

<sup>1</sup>H-NMR (400 MHz, CDCl<sub>3</sub>)

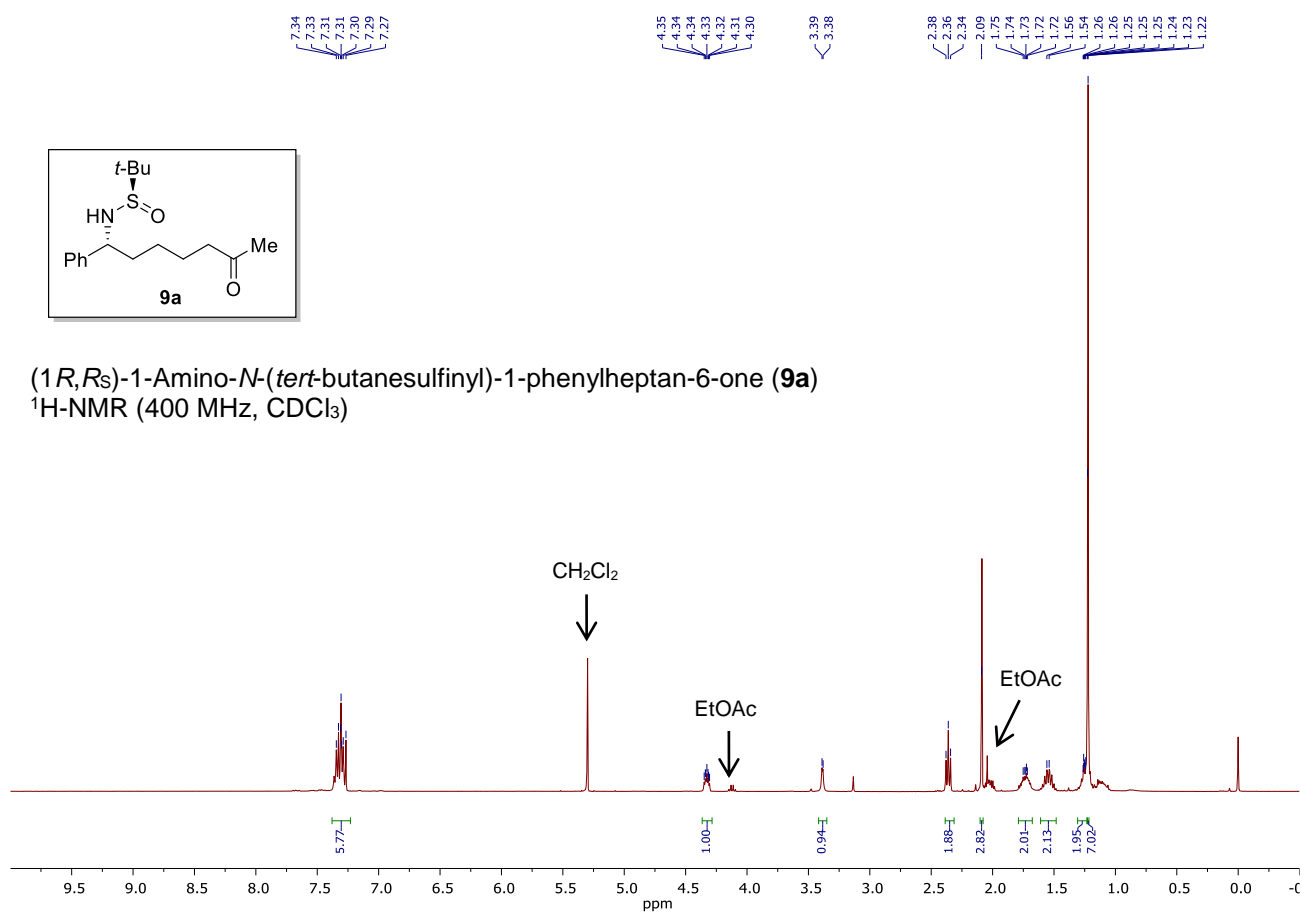

<sup>13</sup>C-NMR (100 MHz, CDCl<sub>3</sub>)

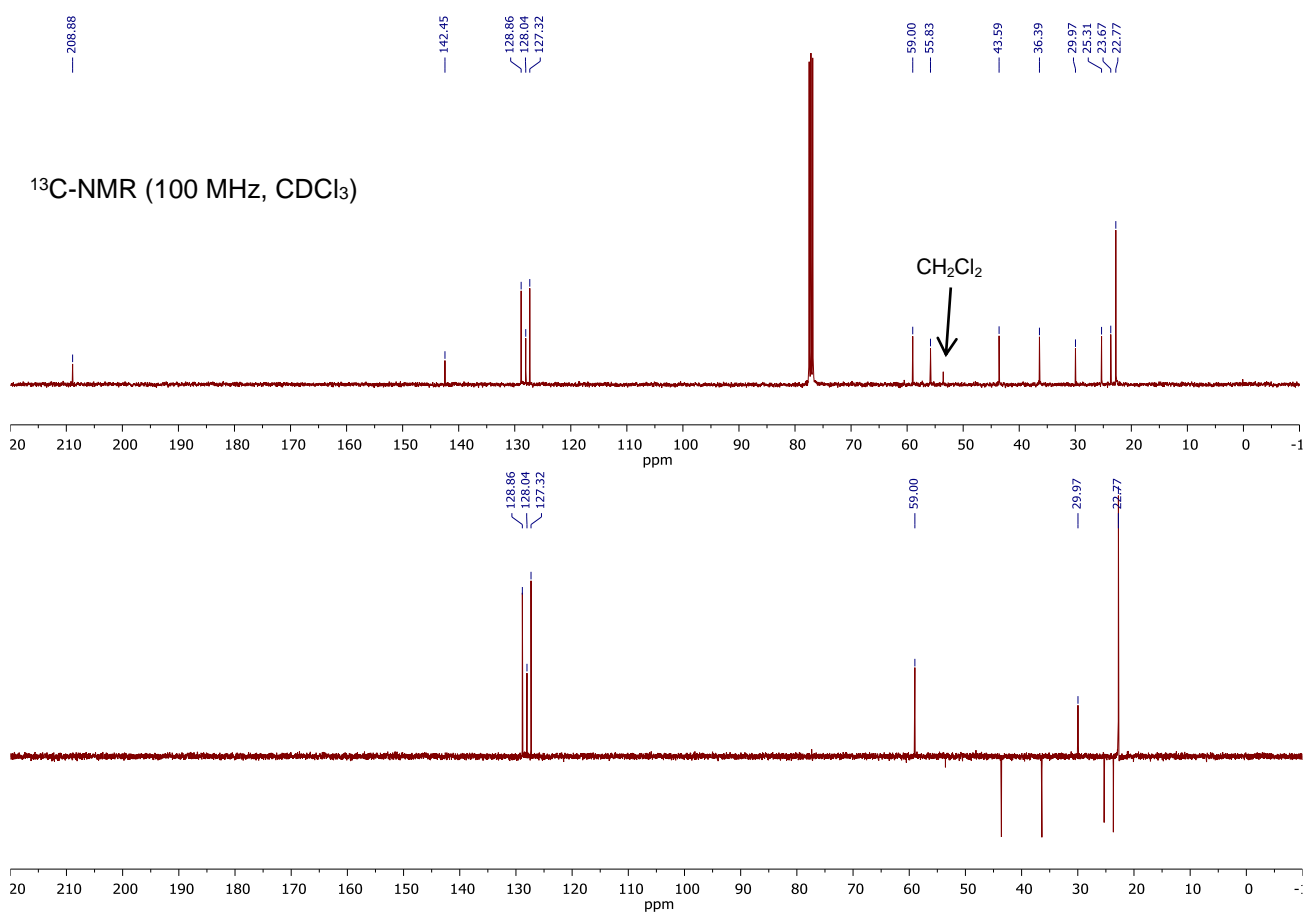

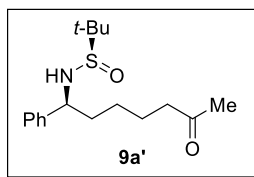

(1*S*,*R*<sub>*S*</sub>)-1-Amino-*N*-(*tert*-butanesulfinyl)-1-phenylheptan-6-one (**9a'**)  
<sup>1</sup>H-NMR (400 MHz, CDCl<sub>3</sub>)

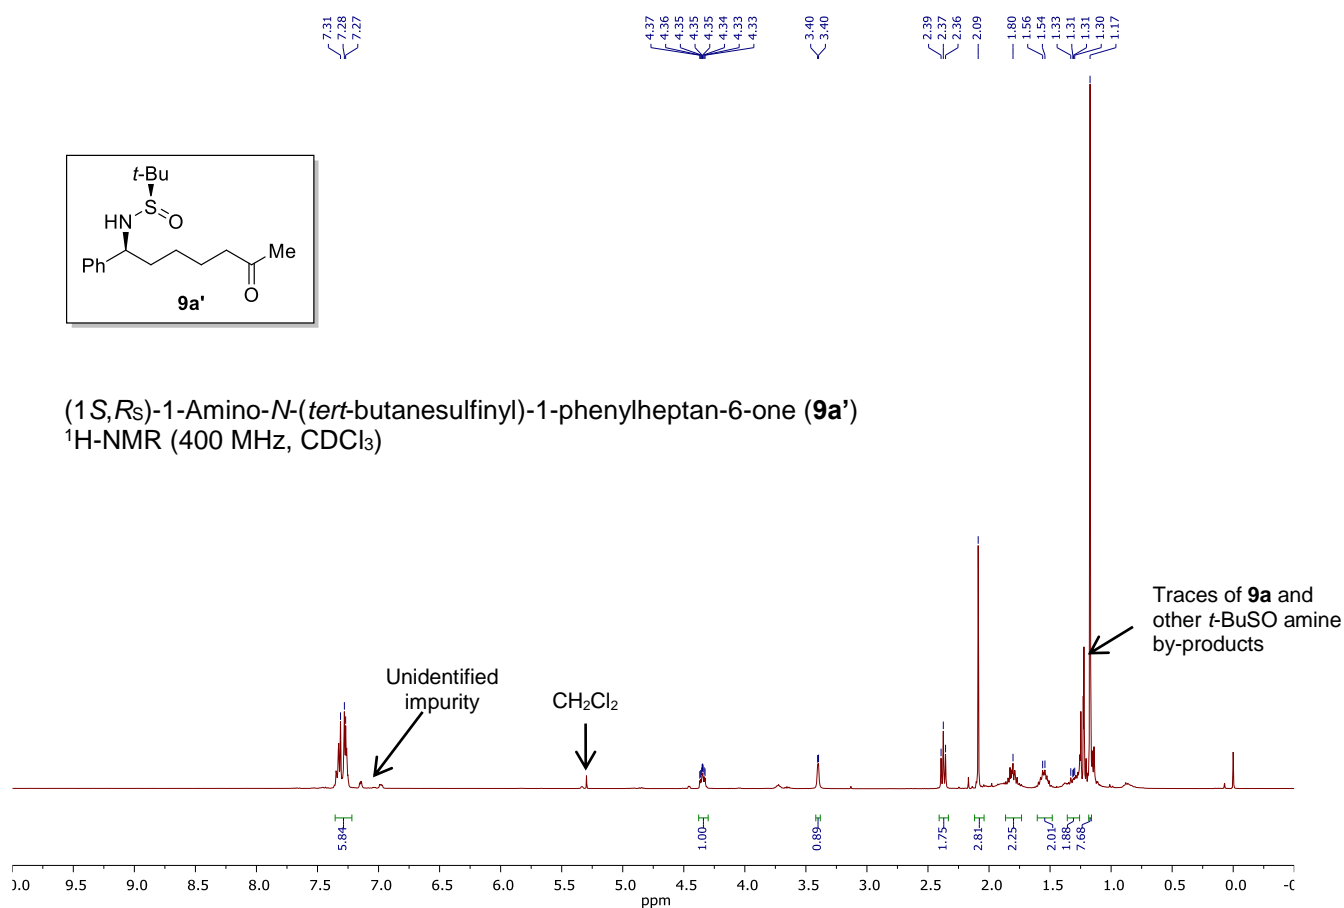

<sup>13</sup>C-NMR (100 MHz, CDCl<sub>3</sub>)

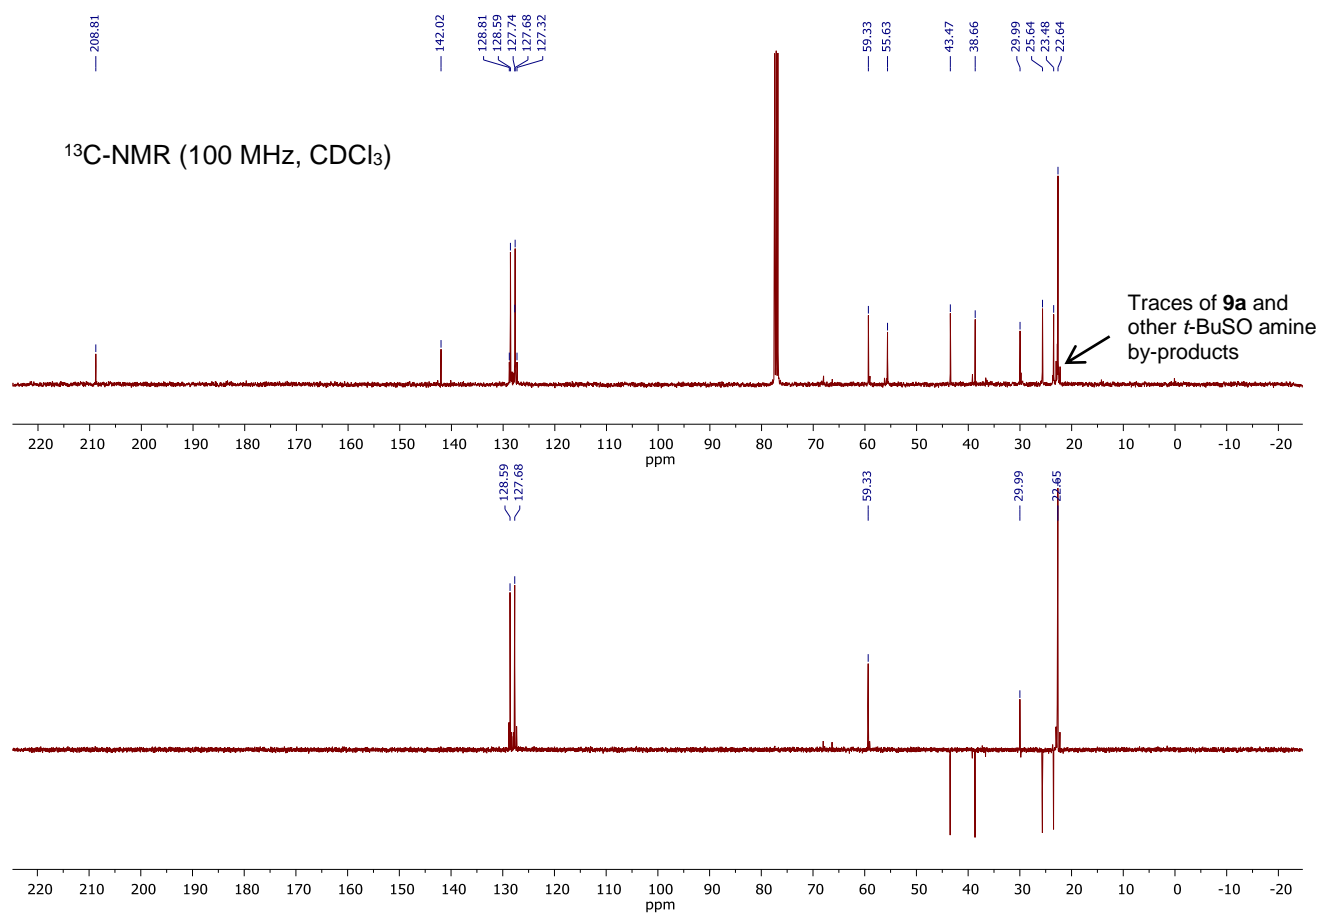

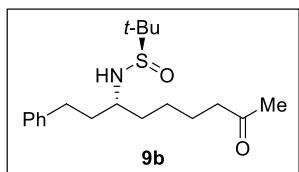

(3*R*,8*S*)-3-Amino-*N*-(*tert*-butanesulfinyl)-1-phenylnonan-8-one (**9b**)  
<sup>1</sup>H-NMR (300 MHz, CDCl<sub>3</sub>)

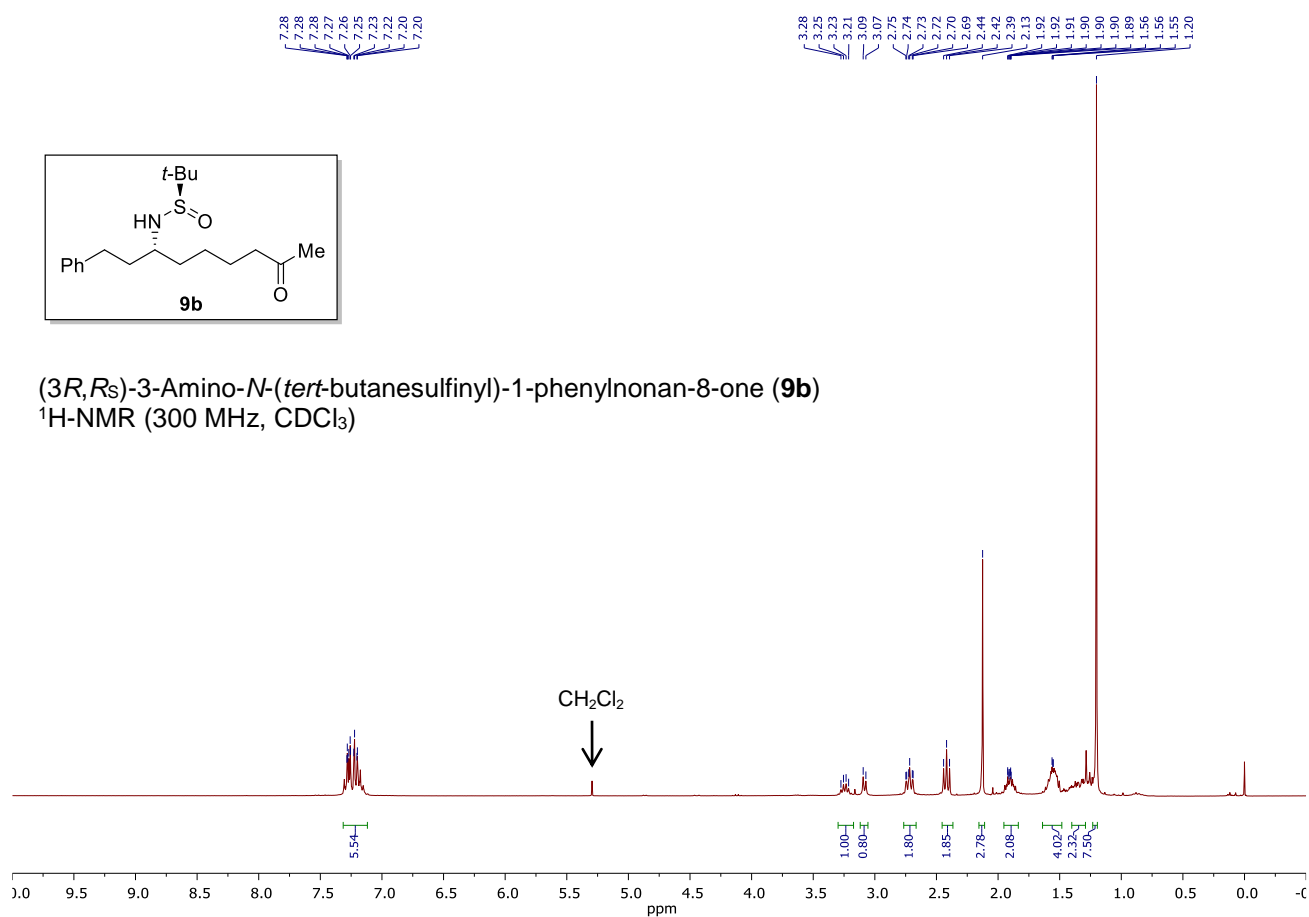

<sup>13</sup>C-NMR (75 MHz, CDCl<sub>3</sub>)

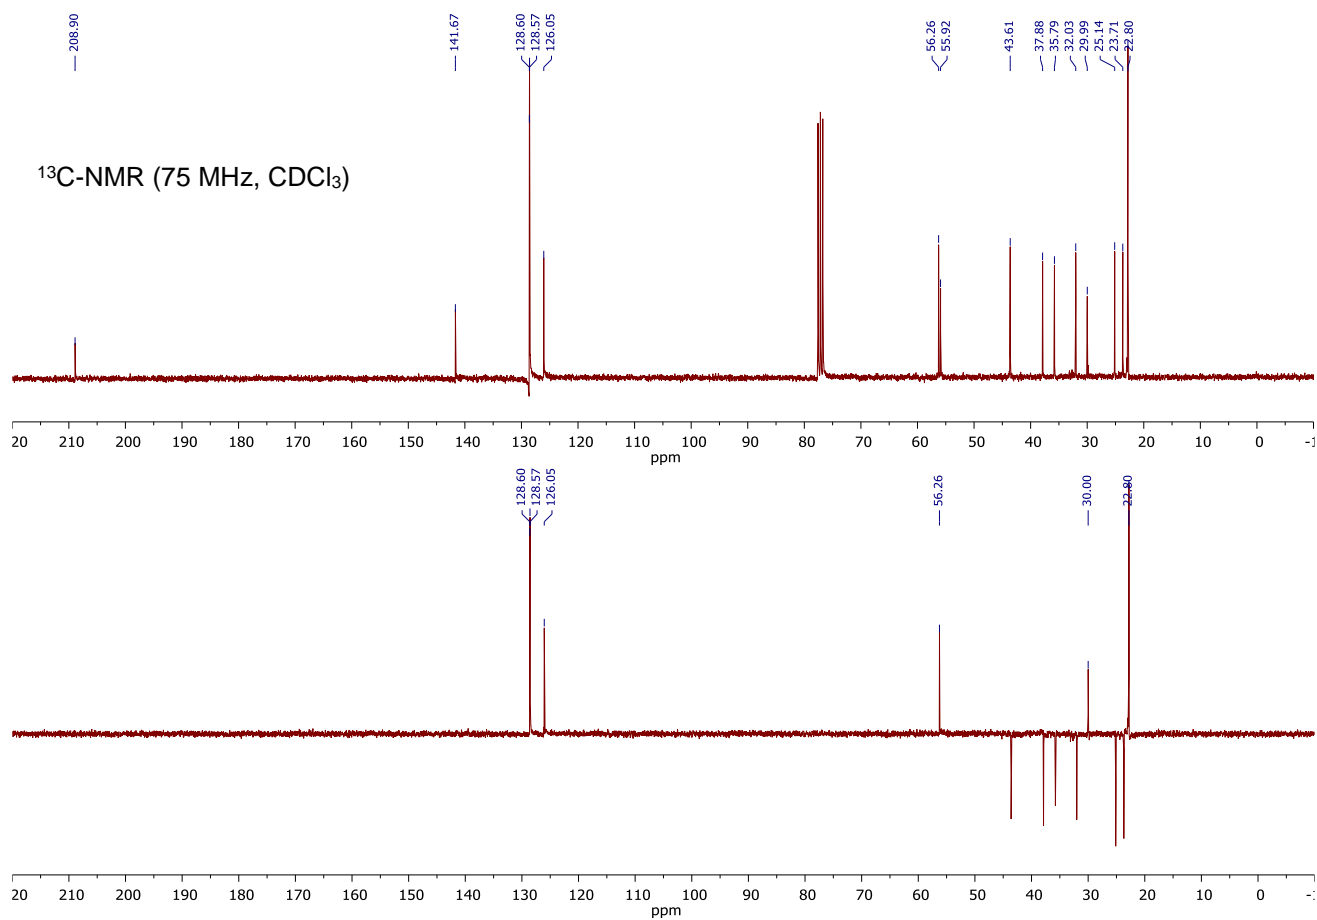

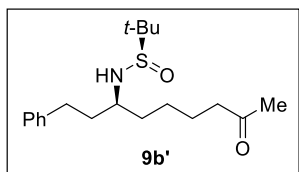

(3*S*, *R*<sub>*S*</sub>)-3-Amino-*N*-(*tert*-butanesulfinyl)-1-phenylnonan-8-one (**9b'**)

<sup>1</sup>H-NMR (300 MHz, CDCl<sub>3</sub>)

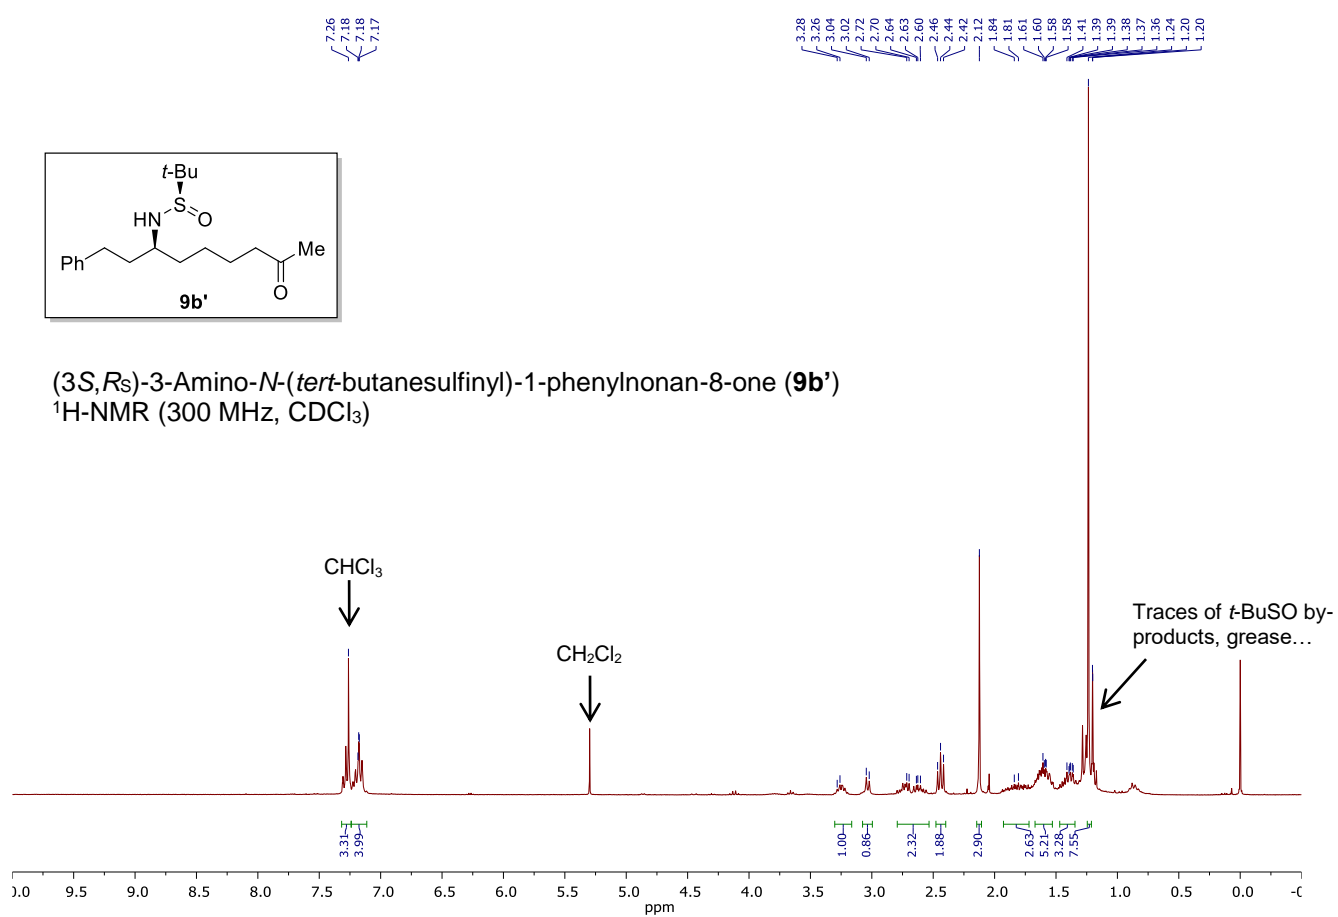

<sup>13</sup>C-NMR (75 MHz, CDCl<sub>3</sub>)

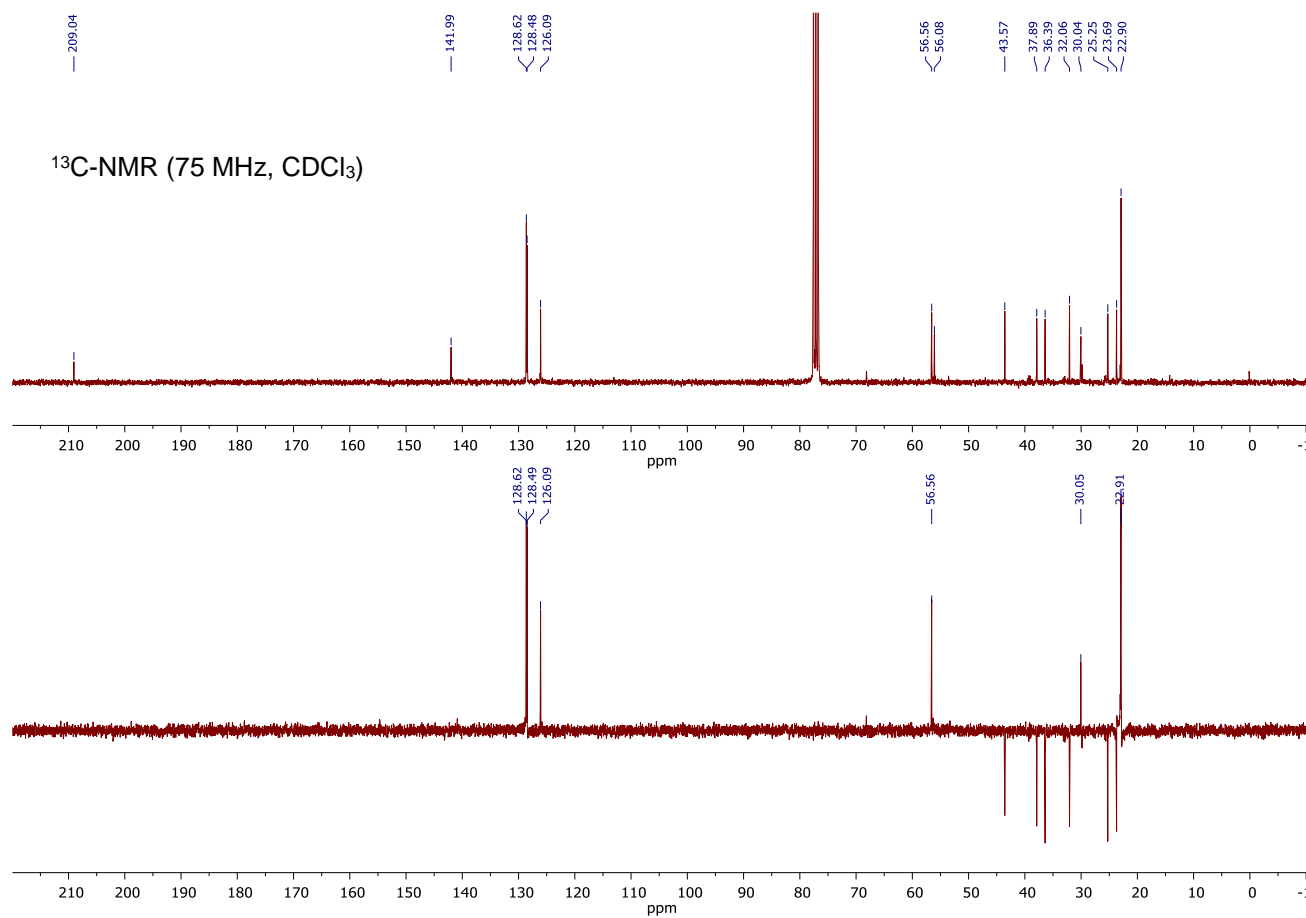



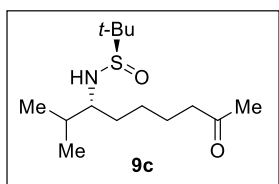

(3*R*,8*S*)-3-Amino-*N*-(*tert*-butanesulfinyl)-2-methylnonan-8-one (**9c**)  
<sup>1</sup>H-NMR (400 MHz, CDCl<sub>3</sub>)

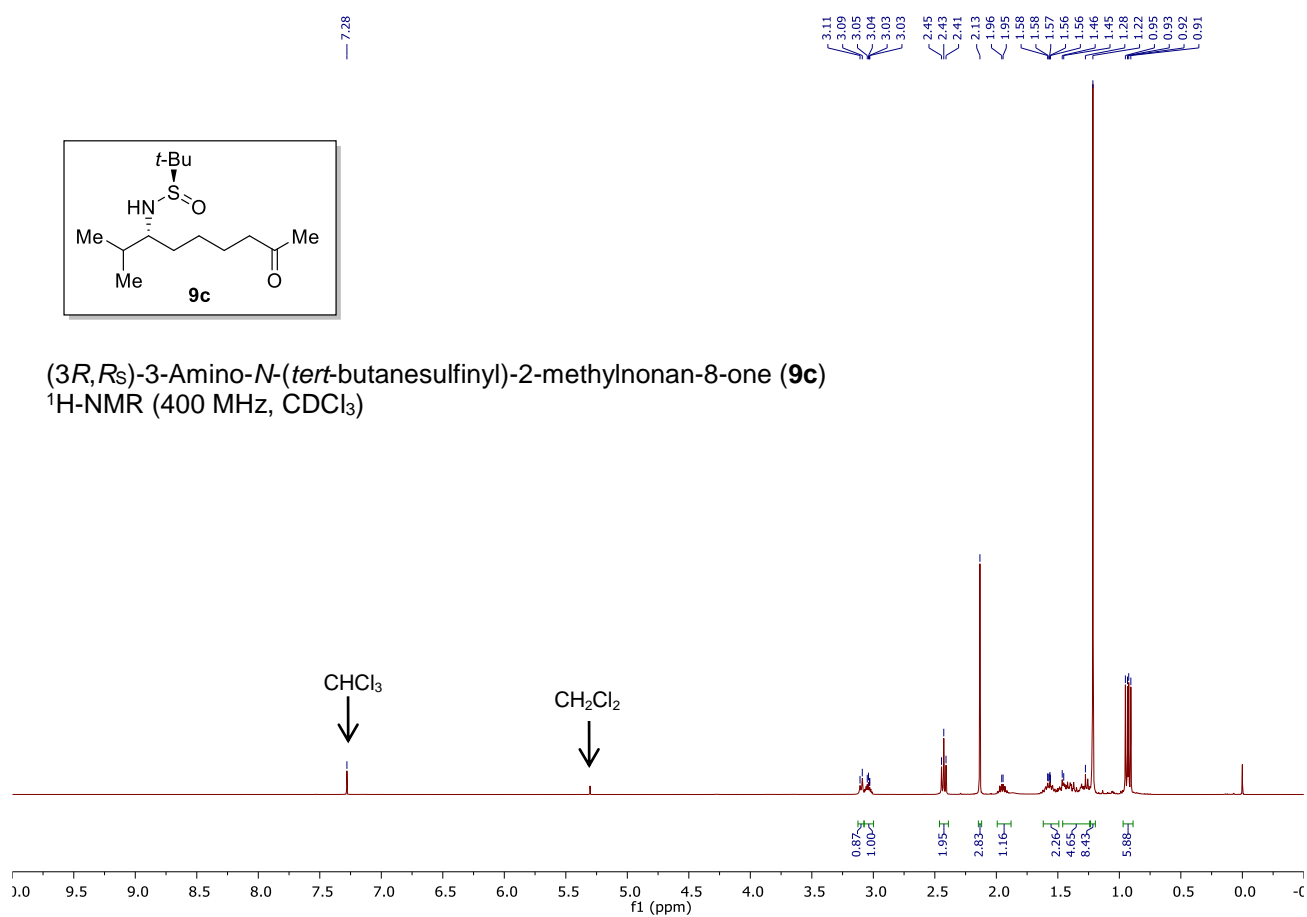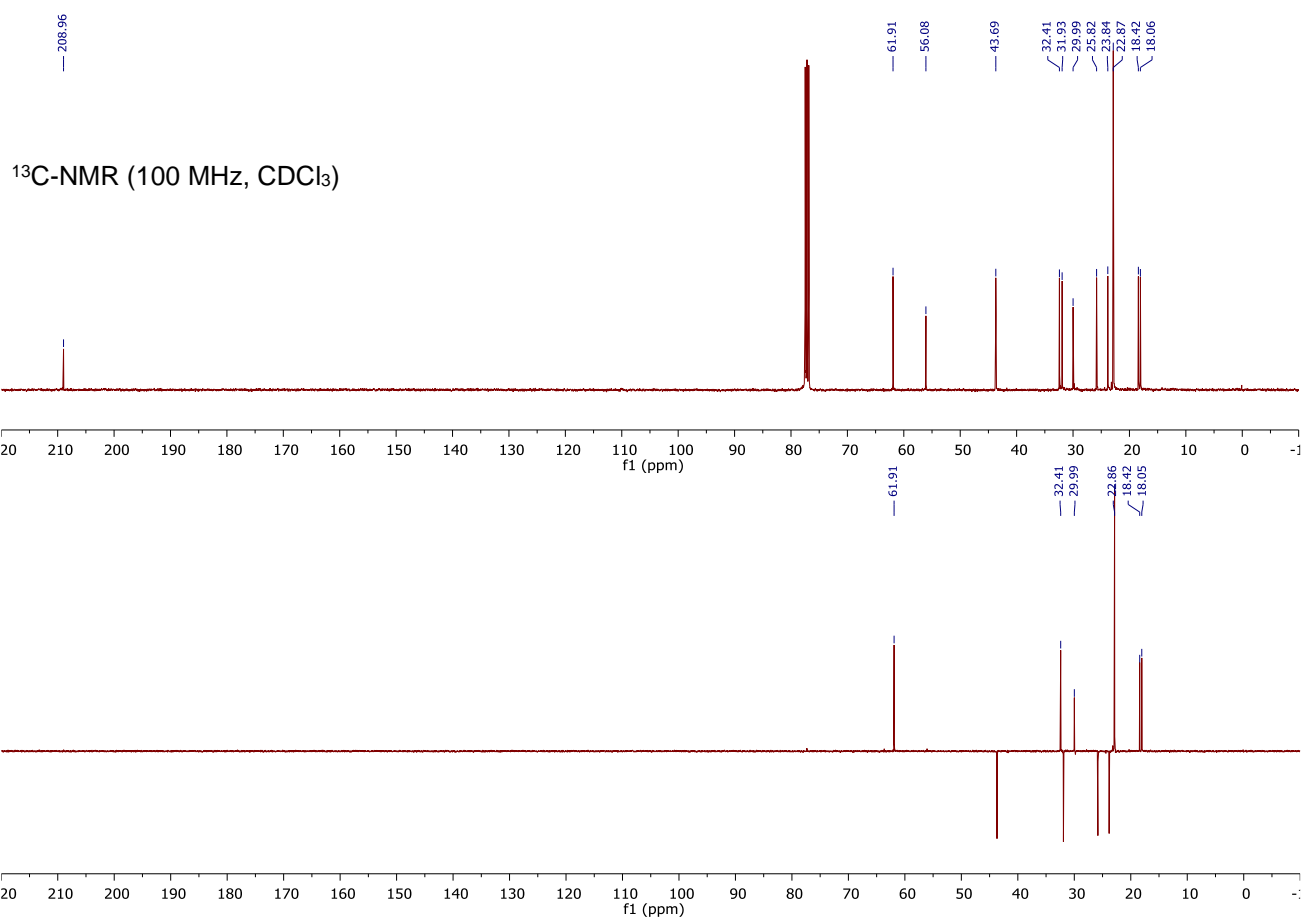

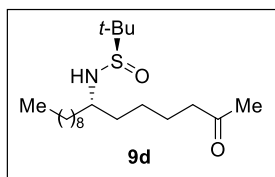

(7*S*,*R*<sub>s</sub>)-7-Amino-*N*-(*tert*-butanesulfinyl)hexadecane-2-one (**9d**)

<sup>1</sup>H-NMR (300 MHz, CDCl<sub>3</sub>)

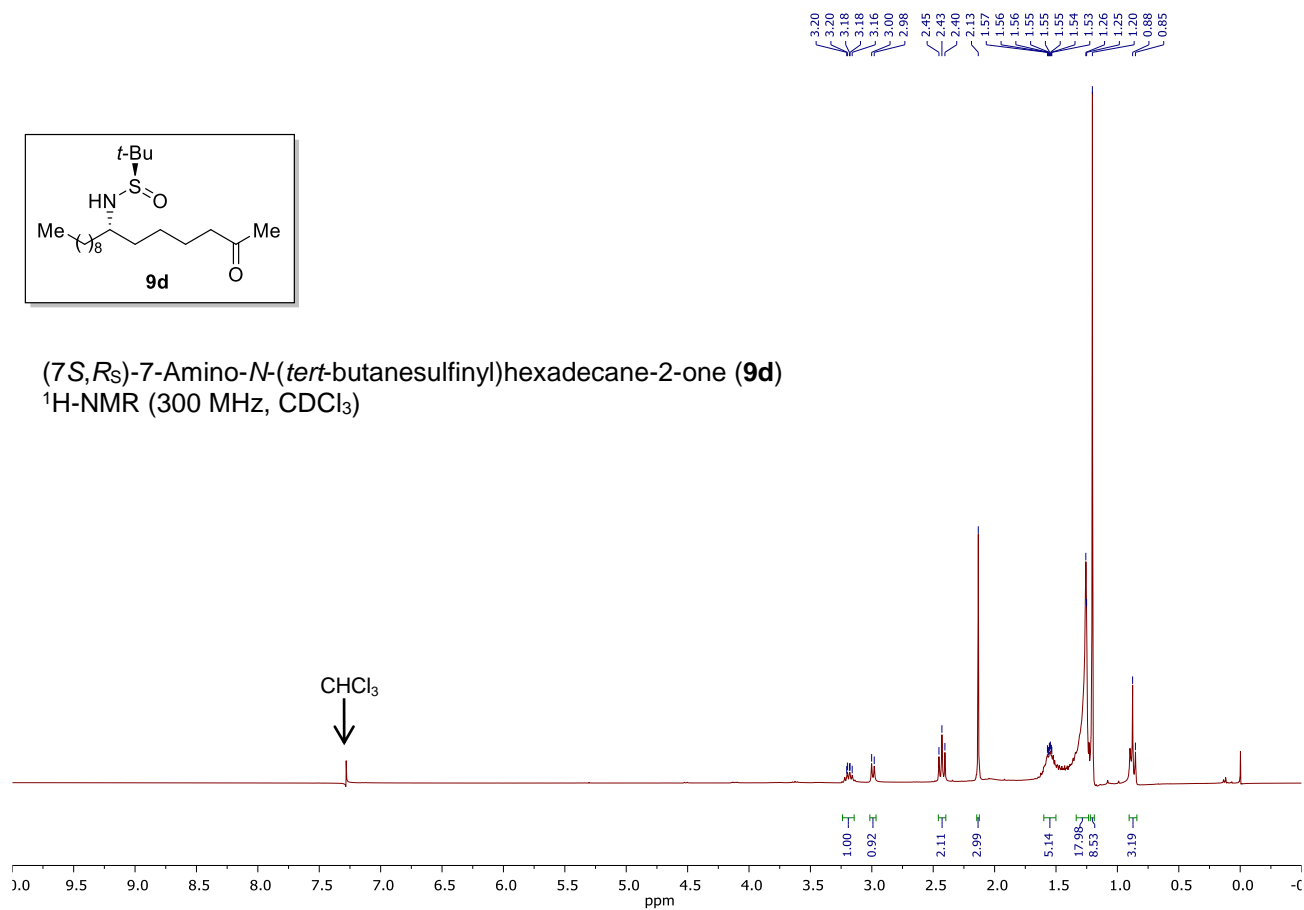

<sup>13</sup>C-NMR (100 MHz, CDCl<sub>3</sub>)

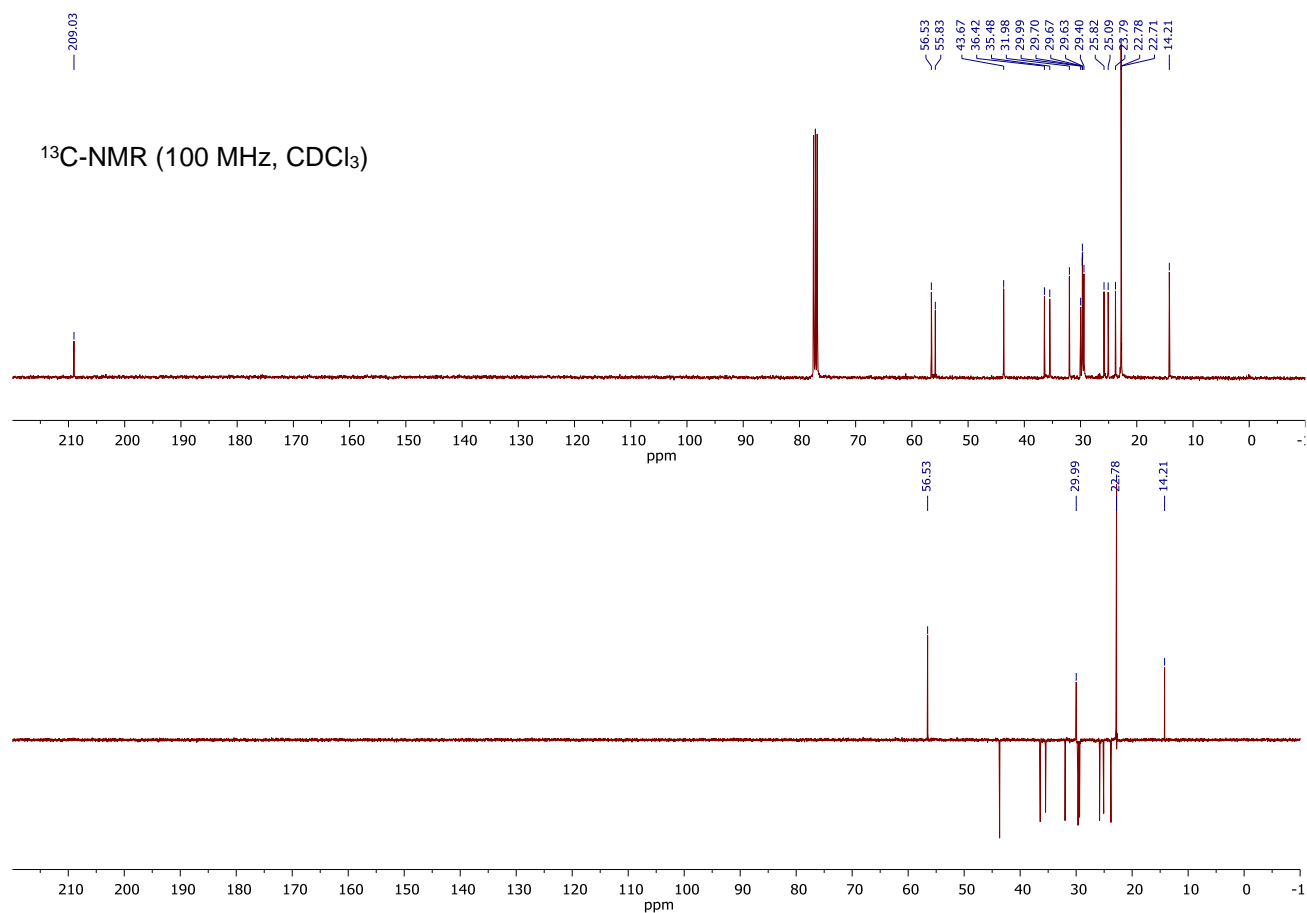

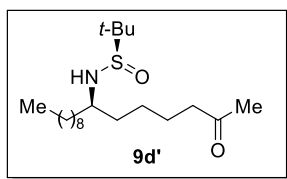

(7*R*,8*S*)-7-Amino-*N*-(*tert*-butanesulfinyl)hexadecane-2-one (**9d'**)  
<sup>1</sup>H-NMR (300 MHz, CDCl<sub>3</sub>)

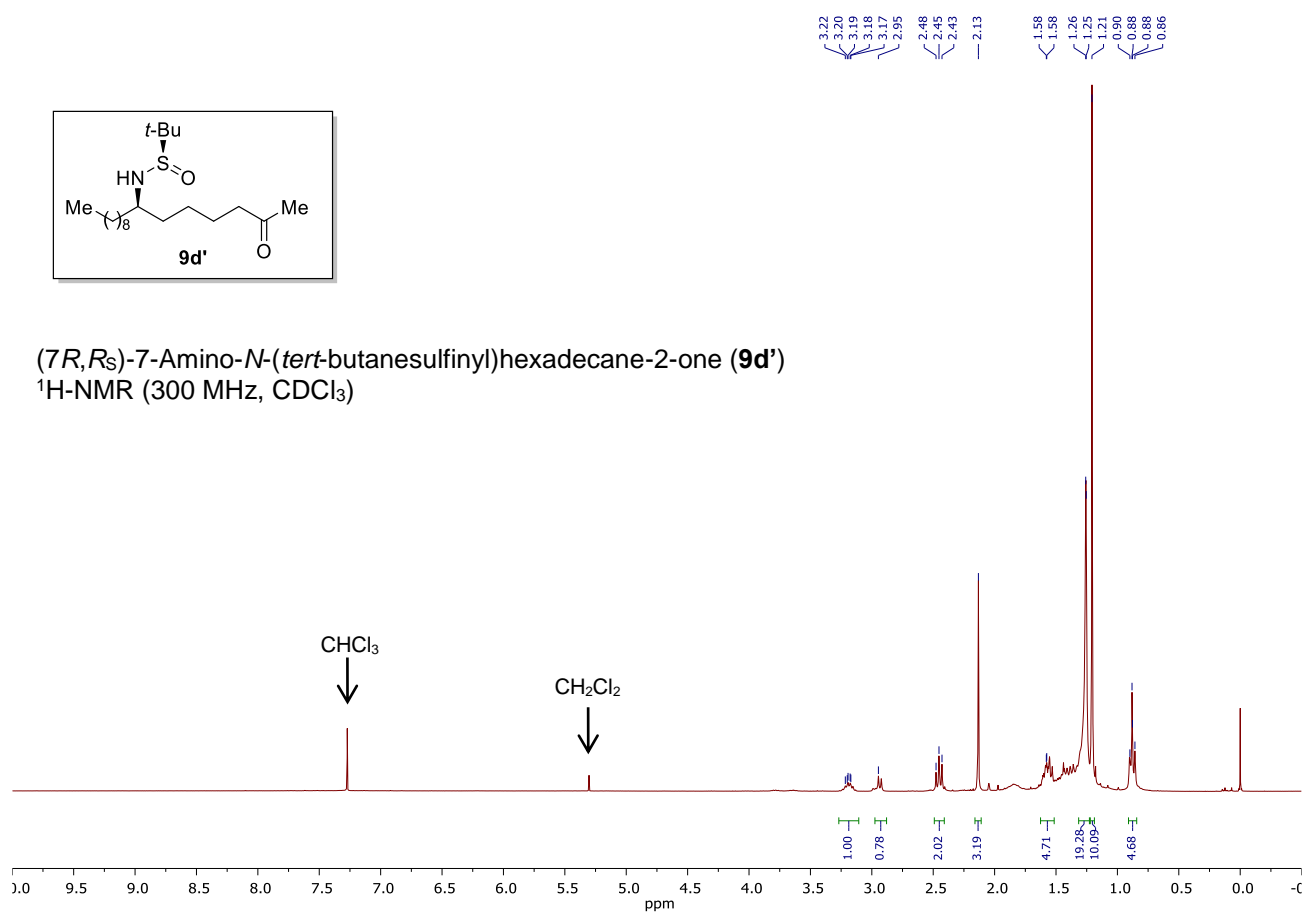

<sup>13</sup>C-NMR (100 MHz, CDCl<sub>3</sub>)

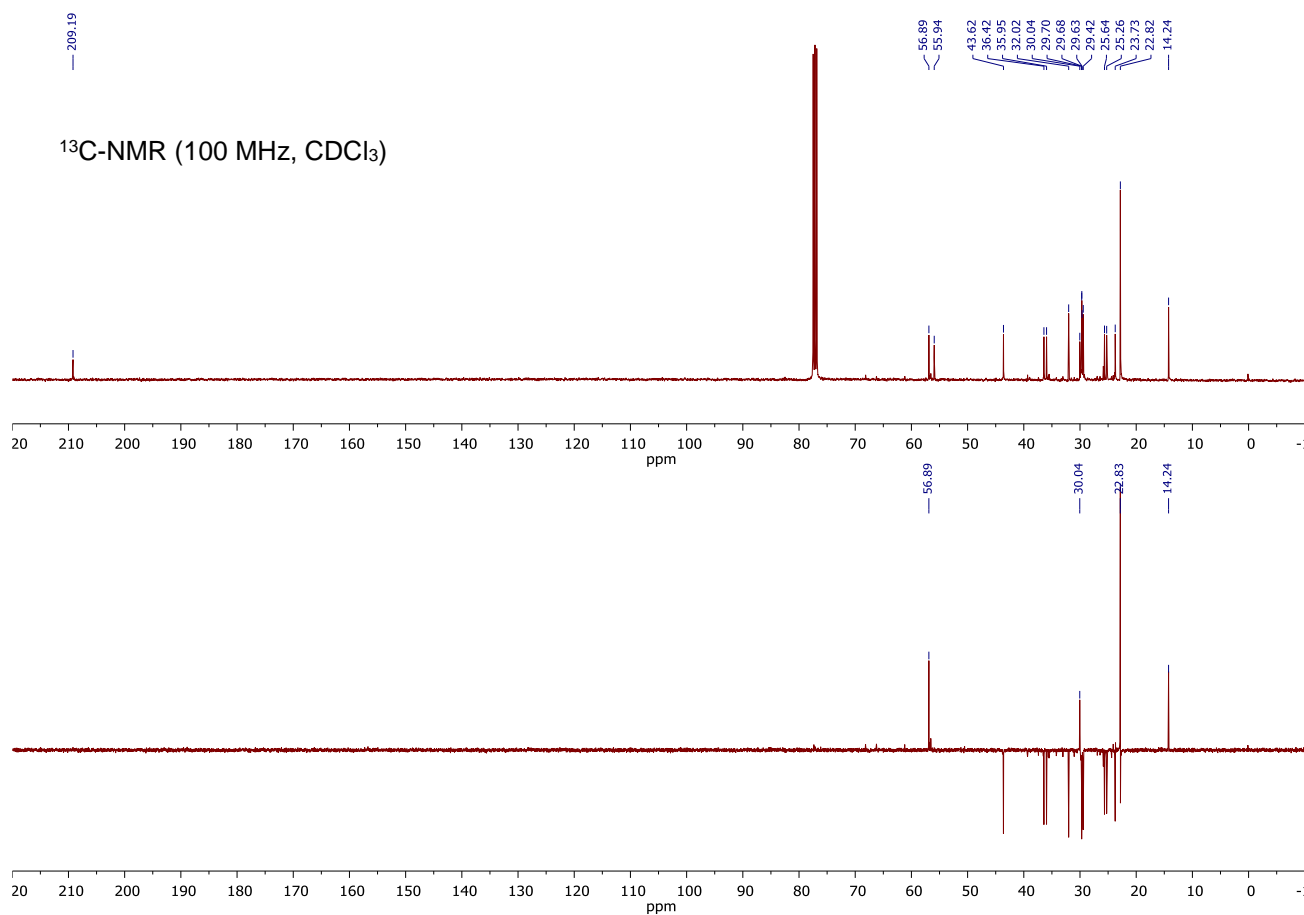

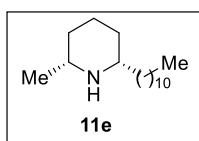

(2*R*,6*S*)-6-Undecyl-2-methylpiperidine (**11e**)  
<sup>1</sup>H-NMR (400 MHz, CDCl<sub>3</sub>)

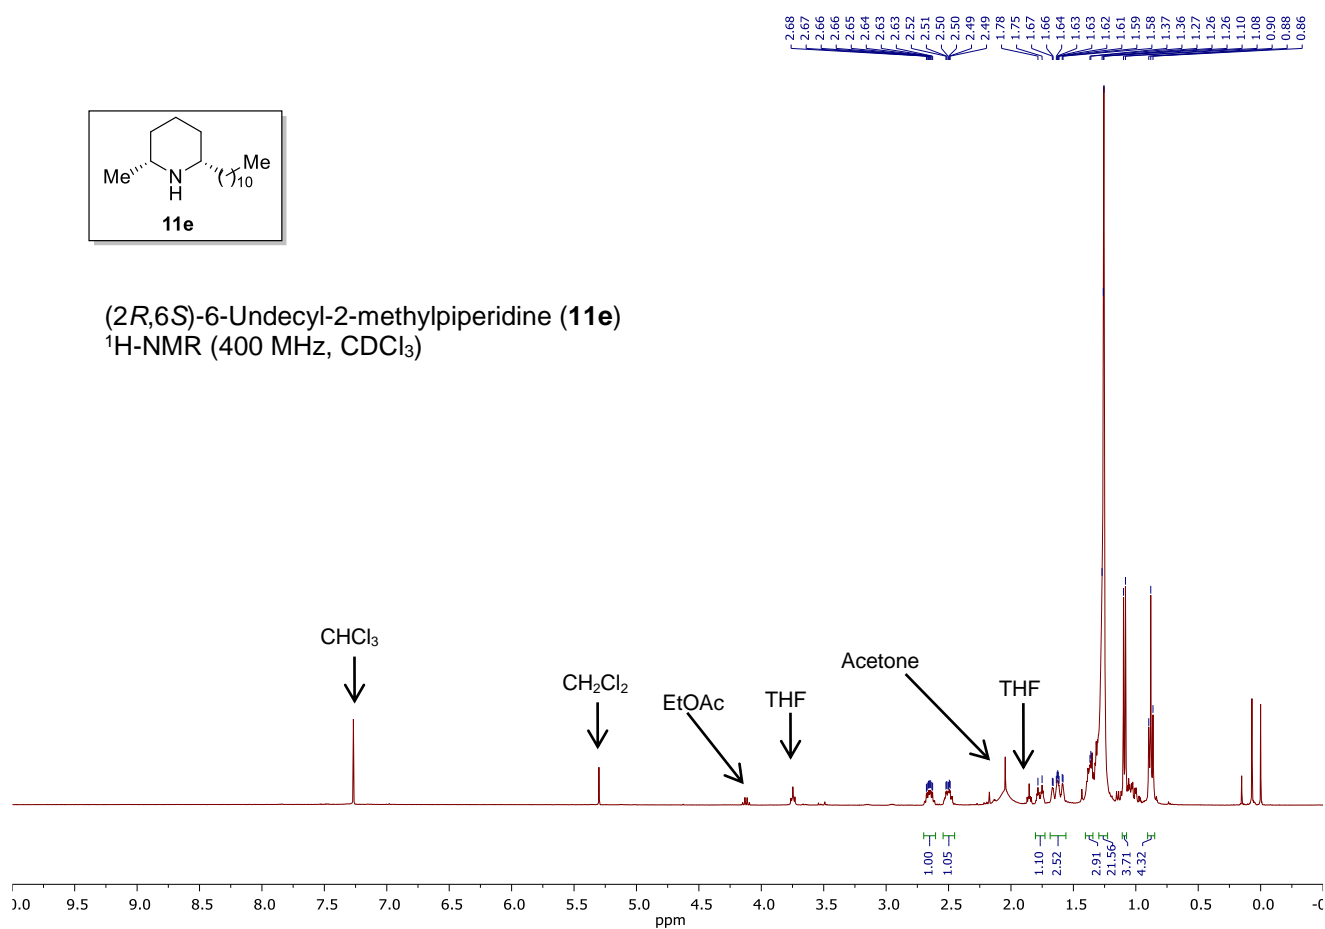

<sup>13</sup>C-NMR (100 MHz, CDCl<sub>3</sub>)

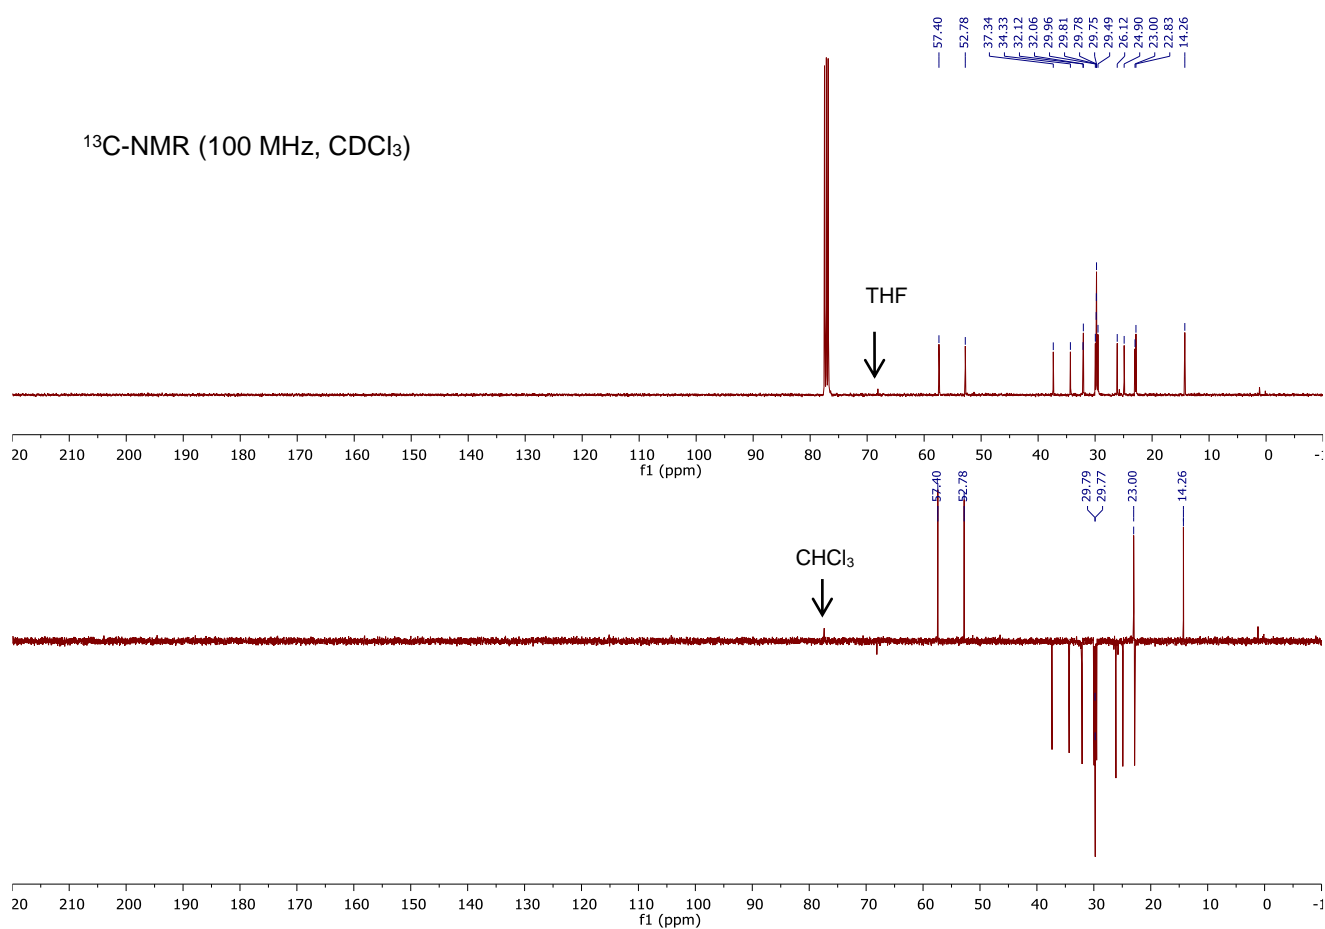

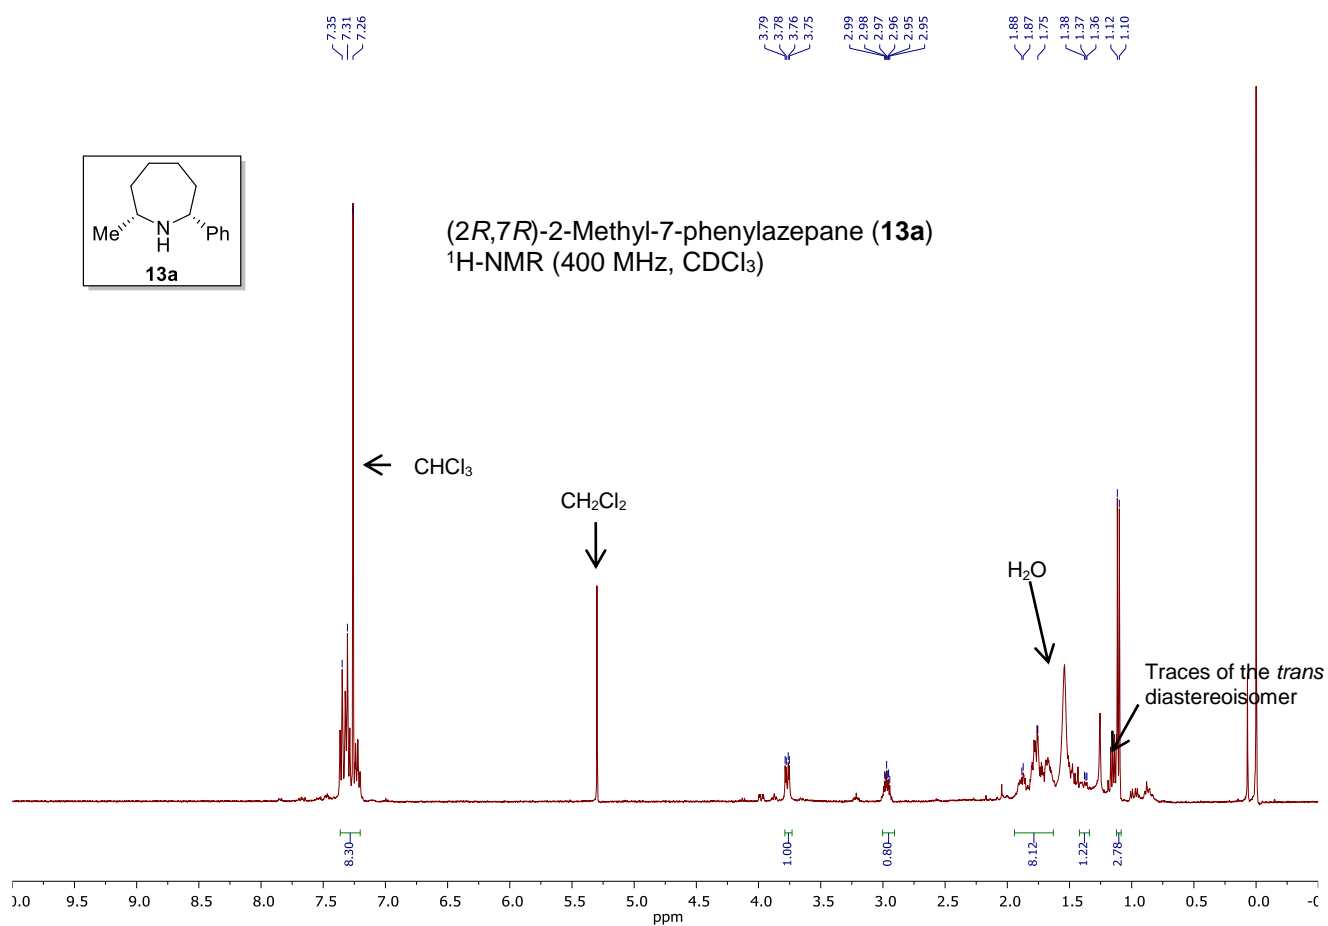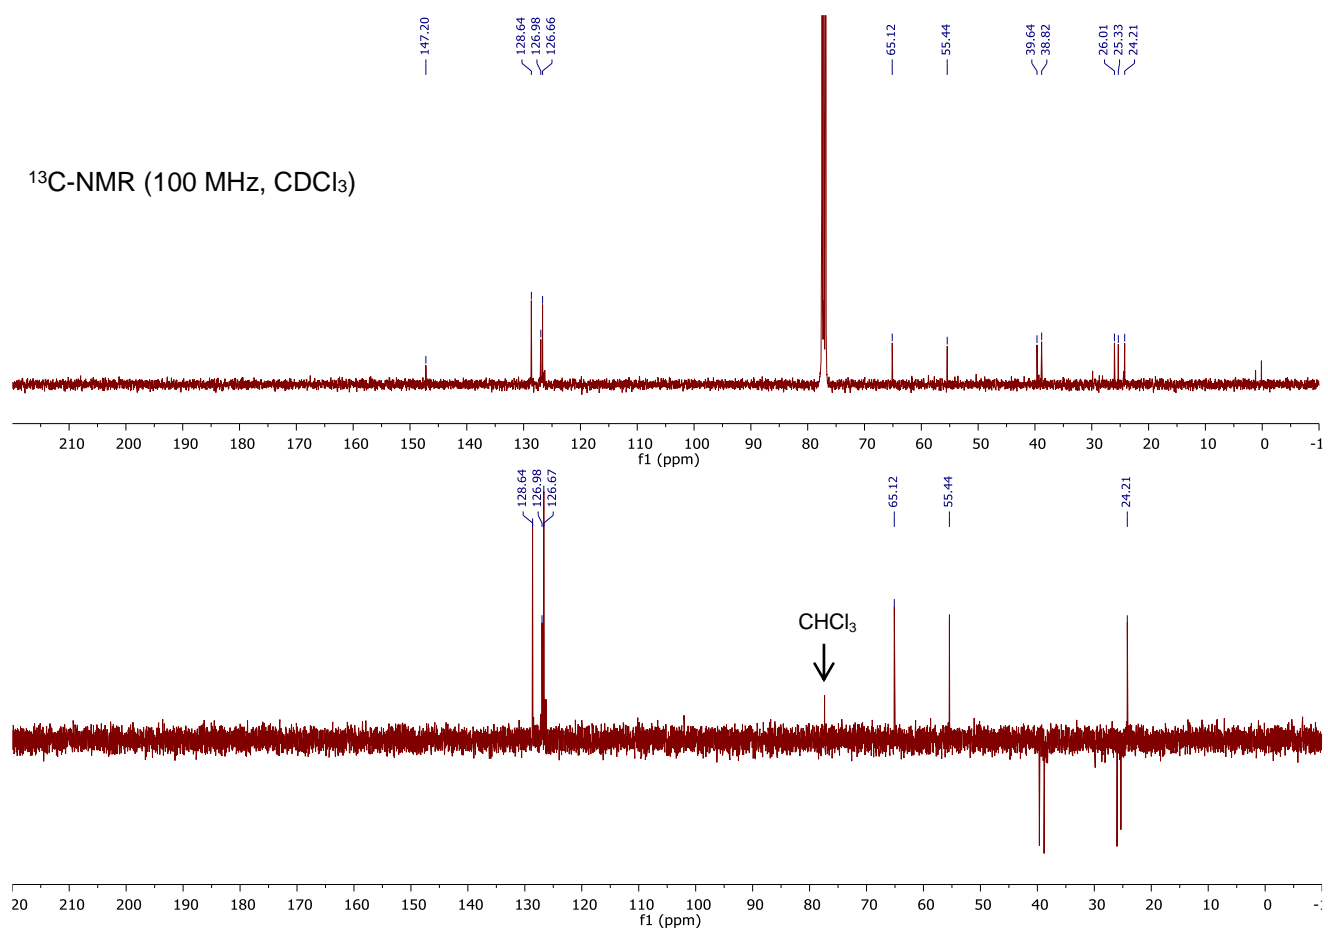

-----  
Acq. Operator : AN  
Acq. Instrument : Instrument 1 Location : -  
Injection Date : 6/15/2021 10:56:01 AM Inj Volume : Manually  
Acq. Method : C:\CHEM32\1\METHODS\CHIRAL70.M  
Last changed : 6/8/2021 1:10:30 PM by AN  
Analysis Method : C:\CHEM32\1\METHODS\OFF\_MAN\_2.M  
Last changed : 6/21/2021 9:51:28 AM by AN  
(modified after loading)  
Additional Info : Peak(s) manually integrated

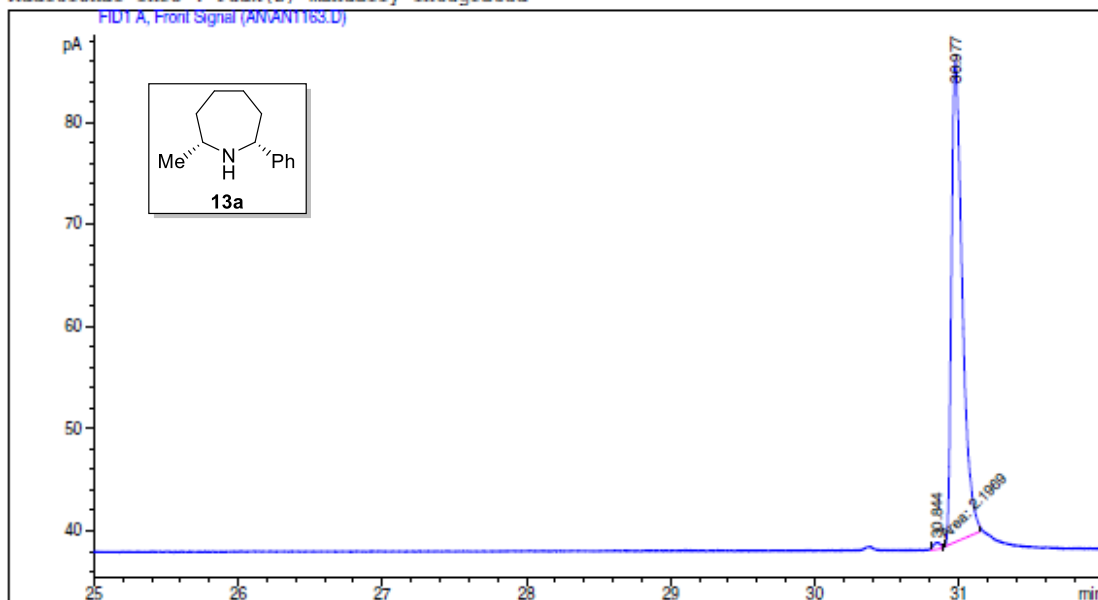

-----  
Area Percent Report  
-----

Sorted By : Signal  
Multiplier: : 1.0000  
Dilution: : 1.0000  
Use Multiplier & Dilution Factor with ISTDs

Signal 1: FID1 A, Front Signal

| Peak # | RetTime [min] | Type | Width [min] | Area [pA*s] | Height [pA] | Area %   |
|--------|---------------|------|-------------|-------------|-------------|----------|
| 1      | 30.844        | MM   | 0.0525      | 2.19690     | 6.96874e-1  | 0.88487  |
| 2      | 30.977        | BB   | 0.0705      | 246.07661   | 47.13287    | 99.11513 |

Totals : 248.27352 47.82974

-----  
\*\*\* End of Report \*\*\*  
-----

=====  
Acq. Operator : AN  
Acq. Instrument : Instrument 1 Location : -  
Injection Date : 6/22/2021 9:18:53 AM Inj Volume : Manually  
Acq. Method : C:\CHEM32\1\METHODS\CHIRAL70.M  
Last changed : 6/8/2021 1:10:30 PM by AN  
Analysis Method : C:\CHEM32\1\METHODS\CHIRAL70.M  
Last changed : 6/22/2021 11:04:01 AM by AN  
(modified after loading)  
Additional Info : Peak(s) manually integrated

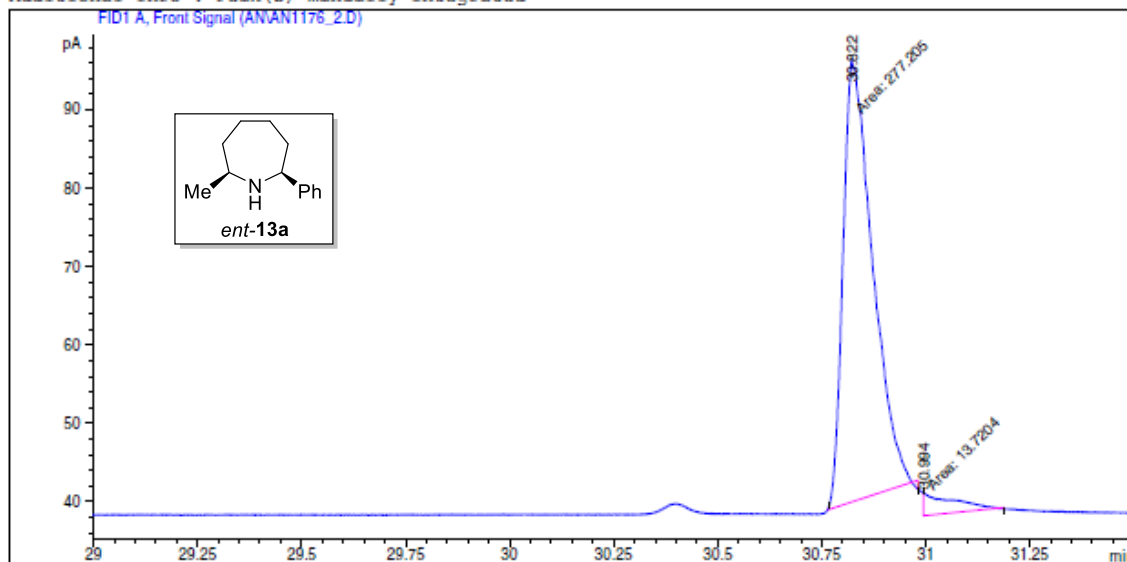

=====  
Area Percent Report  
=====

Sorted By : Signal  
Multiplier: : 1.0000  
Dilution: : 1.0000  
Use Multiplier & Dilution Factor with ISTDs

Signal 1: FID1 A, Front Signal

| Peak # | RetTime [min] | Type | Width [min] | Area [pA*s] | Height [pA] | Area %   |
|--------|---------------|------|-------------|-------------|-------------|----------|
| 1      | 30.822        | MM   | 0.0814      | 277.20483   | 56.74377    | 95.28387 |
| 2      | 30.994        | MM   | 0.0788      | 13.72040    | 2.90216     | 4.71613  |

Totals : 290.92524 59.64593

=====  
\*\*\* End of Report \*\*\*

-----  
Acq. Operator : AN  
Acq. Instrument : Instrument 1 Location : -  
Injection Date : 6/15/2021 9:20:42 AM Inj Volume : Manually  
Acq. Method : C:\CHEM32\1\METHODS\CHIRAL70.M  
Last changed : 6/8/2021 1:10:30 PM by AN  
Analysis Method : C:\CHEM32\1\METHODS\OFF\_MAN\_2.M  
Last changed : 6/21/2021 9:48:14 AM by AN  
(modified after loading)  
Additional Info : Peak(s) manually integrated  
-----

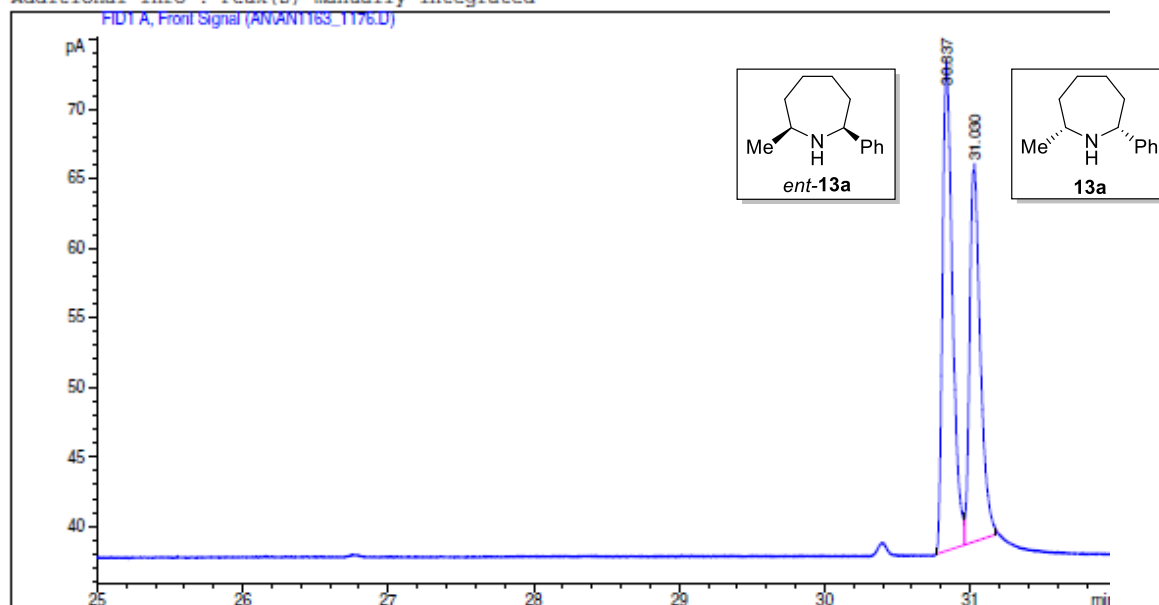

-----  
Area Percent Report  
-----

Sorted By : Signal  
Multiplier: : 1.0000  
Dilution: : 1.0000  
Use Multiplier & Dilution Factor with ISTDs

Signal 1: FID1 A, Front Signal

| Peak # | RetTime [min] | Type | Width [min] | Area [pA*s] | Height [pA] | Area %   |
|--------|---------------|------|-------------|-------------|-------------|----------|
| 1      | 30.837        | BV   | 0.0677      | 167.04810   | 34.99392    | 54.75626 |
| 2      | 31.030        | VB   | 0.0666      | 138.02769   | 27.09019    | 45.24374 |

Totals : 305.07579 62.08411

-----  
\*\*\* End of Report \*\*\*  
-----
